# 1 Nuclear HMGB1 protects from non-alcoholic fatty liver diseases through 2 negative regulation of liver X receptor

3  
4  
5 Jean Personnaz<sup>1,2</sup>, Enzo Piccolo<sup>1,2</sup>, Alizée Dortignac<sup>1,2</sup>, Jason S. Iacovoni<sup>2</sup>, Jérôme Mariette<sup>3</sup>,  
6 Arnaud Polizzi<sup>4</sup>, Aurélie Batut<sup>2</sup>, Simon Deleruyelle<sup>2</sup>, Romain Paccoud<sup>2</sup>, Elsa Moreau<sup>2</sup>, Frédéric  
7 Martins<sup>2,5</sup>, Thomas Clouaire<sup>6</sup>, Fadila Benhamed<sup>7</sup>, Alexandra Montagner<sup>2</sup>, Walter A. Wahli<sup>4,8,9</sup>,  
8 Robert F. Schwabe<sup>10</sup>, Armelle Yart<sup>1,2</sup>, Isabelle Castan-Laurell<sup>1,2</sup>, Catherine Postic<sup>7</sup>, Cédric Moro<sup>2</sup>,  
9 Gaele Legube<sup>6</sup>, Chih-Hao Lee<sup>11</sup>, Hervé Guillou<sup>4</sup>, Philippe Valet<sup>1,2</sup>, Cédric Dray<sup>1,2</sup> & Jean-  
10 Philippe Pradère<sup>1,2\*</sup>

11  
12 <sup>1</sup>Institut RESTORE, UMR 1301, Institut National de la Santé et de la Recherche Médicale  
13 (INSERM), -CNRS-Université Paul Sabatier, Université de Toulouse, Toulouse, France.

14  
15 <sup>2</sup>Institut des Maladies Métaboliques et Cardiovasculaires, UMR 1048/I2MC, Institut National de  
16 la Santé et de la Recherche Médicale (INSERM), Université de Toulouse, Toulouse, France.

17  
18 <sup>3</sup>MIAT, Université de Toulouse, INRAE, 31326 Castanet-Tolosan, France.

19 <sup>4</sup>Toxalim, INRAE UMR 1331, ENVT, INP-Purpan, University of Toulouse, Paul Sabatier  
20 University, F-31027, Toulouse, France.

21  
22 <sup>5</sup>Plateforme GeT, Genotoul, 31100 Toulouse, France.

23  
24 <sup>6</sup>LBCMCP, Centre de Biologie Intégrative (CBI), CNRS, Université de Toulouse, France.

25  
26 <sup>7</sup>Université de Paris, Institut Cochin, CNRS, INSERM, F- 75014 Paris, France.

27  
28 <sup>8</sup>Center for Integrative Genomics, University of Lausanne, Le Génopode, CH-1015 Lausanne,  
29 Switzerland.

30  
31 <sup>9</sup>Lee Kong Chian School of Medicine, Nanyang Technological University Singapore, Clinical  
32 Sciences Building, 11 Mandalay Road, Singapore 308232, Singapore.

33  
34 <sup>10</sup>Department of Medicine, Columbia University, New York, New York, USA.

35  
36 <sup>11</sup>Department of Molecular Metabolism, Harvard T.H. Chan School of Public Health, Boston,  
37 MA, USA

38 \* **Corresponding author:** jean-philippe.pradere@inserm.fr

39  
40 **Running title:** Nuclear HMGB1 as a new repressor of lipid synthesis in hepatocyte.

44 **Abstract**

45 Dysregulations of lipid metabolism in the liver may trigger steatosis progression leading to  
46 potentially severe clinical consequences such as non-alcoholic fatty liver diseases (NAFLD).  
47 Molecular mechanisms underlying liver lipogenesis are very complex and fine-tuned by  
48 chromatin dynamics and the activity of multiple key transcription factors. Here, we demonstrate  
49 that the nuclear factor HMGB1 acts as a strong repressor of liver lipogenesis during metabolic  
50 stress in NAFLD. Mice with liver-specific *Hmgb1*-deficiency display exacerbated liver steatosis  
51 and hepatic insulin resistance when subjected to a high-fat diet or after fasting/refeeding. Global  
52 transcriptome and functional analysis revealed that the deletion of *Hmgb1* gene enhances LXR $\alpha$   
53 activity resulting in increased lipogenesis. HMGB1 repression is not mediated through  
54 nucleosome landscape re-organization but rather via a preferential DNA occupation in region  
55 carrying genes regulated by LXR $\alpha$ . Together these findings suggest that hepatocellular HMGB1  
56 protects from liver steatosis development. HMGB1 may constitute a new attractive option to  
57 therapeutically target LXR $\alpha$  axis during NAFLD.

58  
59  
60  
61  
62  
63  
64  
65  
66  
67  
68  
69  
70  
71  
72  
73  
74  
75  
76  
77  
78  
79  
80  
81  
82  
83  
84

## 85 **Introduction**

86 Along the epidemic of obesity, non-alcoholic fatty liver disease (NAFLD) is progressing  
87 worldwide, affecting nearly 25% of the world-wide adult population (1) and generating numerous  
88 complications such as liver insulin resistance, non-alcoholic steatohepatitis and hepatocellular  
89 carcinoma (2). Liver steatosis consists in ectopic lipid storage within the hepatocytes, which aims  
90 at buffering circulating lipids and thus preventing lipotoxicity in different organs. Mechanisms  
91 underlying lipogenesis (from lipid uptake to lipid esterification and *de novo* lipogenesis) are  
92 extremely complex and consist in a subtle orchestration of the actions of different transcription  
93 factors (TFs) in close coordination with chromatin dynamics (3).

94  
95 Among TFs involved in liver lipogenesis regulation, Liver X Receptors (LXRs) are members of  
96 the nuclear hormone receptor superfamily and are among the most central/dominant actors in this  
97 process. LXRs consist in two isoforms that share a very high homology but differ in their tissue  
98 expression profile. While LXR $\alpha$  (NR1H3) is mainly expressed in metabolic tissues (liver, adipose  
99 tissues), LXR $\beta$  (NR1H2) is expressed ubiquitously (4). In the context of dyslipidemia or  
100 fasting/refeeding conditions and after activation by certain lipid species (5), LXRs directly  
101 coordinate, in a duo with its obligate partner, retinoic acid receptor (RXR), the expression of  
102 numerous key enzymes involved in cholesterol and lipid metabolism (*Abcg5*, *Abcg8*, *Fasn*, *Scd-*  
103 *1*), but are also capable to modulate indirectly the lipogenesis through the regulation of other key  
104 TFs like SREBP1c, ChREBP or PPAR $\gamma$  (4, 6, 7) that are also involved in the lipogenic  
105 transcription program. The current consensus on liver lipogenesis is that there is a hierarchical  
106 interplay between all TFs involved, where LXR is a very central piece; SREBP1 and ChREBP are  
107 crucial downstream key players while PPAR $\gamma$ 's role appears more supportive (8). LXRs activity  
108 is subtly regulated by the interaction with the nuclear receptor co-repressors (NCoR) or the  
109 nuclear receptor coactivators protein complex (8) upon specific agonist activation. Recent  
110 evidences are now showing the emerging role of some methylase/demethylase enzymes in the  
111 modulation of LXR activity through the chromatin packaging and subsequent availability, adding  
112 one more complex layer of regulation (9, 10).

113 Global knockout of LXRs induces a severe reduction of liver lipid synthesis in wild type mice and  
114 could even prevent liver steatosis in *ob/ob* mice (11–13). LXR $\alpha$  deletion knockout leads to a  
115 drastic down-regulation of *Srebf1* expression associated with a reduced lipogenesis (6). Moreover  
116 LXRs agonist treatment increases plasma and hepatic TG in mice and humans (14, 15) supporting  
117 a key role of LXRs in fatty acid synthesis and liver steatosis progression. Therapeutic targeting of

118 LXRs is still challenging as adverse effects have been described (15) and more insights regarding  
119 LXRs upstream regulators may be helpful to design novel therapeutic avenues.

120

121 HMGB1 belongs to the family of high mobility group proteins, which after the histones represents  
122 the most abundant proteins in the nucleus. In recent years, HMGB1 has also been scrutinized for  
123 its role in the extracellular cellular compartment as a potent inflammatory factor, notably during  
124 sterile inflammation (9). Originally however, HMGB1 has been known for its role in the nucleus  
125 (17) as a protein capable of binding chromatin on unspecific domains (18) in a very dynamic  
126 manner (19). HMGB1 may affect several biological functions such as VDJ recombination, DNA  
127 repair (20), chromatin assembly and gene transcription through different mechanisms, such as  
128 DNA bending/looping, nucleosome formation (21, 22), interaction with the transcription  
129 machinery including TFs themselves (19, 23–25). A very recent report depicts nuclear HMGB1 as  
130 an even more versatile factor able to bind to topologically-associated domains or RNA directly to  
131 regulate proliferation or senescence programs (26). In cultured cells, while HMGB1 deletion  
132 leads to minor changes in histone numbers, it results in notable changes of the RNA pool (22), in  
133 local chromatin remodeling (27) or the global transcriptome (26). However only a sparse number  
134 of studies have been carried out *in vivo* (27). The global ablation of *Hmgb1* generates a severe  
135 phenotype with perinatal mortality (28), likely due to a defective glucocorticoid signaling leading  
136 to a poor utilization of hepatic glycogen and resulting in a lethal hypoglycemia, whereas  
137 hepatocyte-specific HMGB1 ablation did not have a major impact under homeostatic conditions  
138 (29). Thus, in this context it seems particularly relevant to explore the role of nuclear HMGB1 *in*  
139 *vivo* especially during metabolic stress, where the dynamics of the chromatin are critical to  
140 orchestrate the activity of key TFs and gene transcription programs in order to buffer stress  
141 mediators and maintain whole-body homeostasis.

142

143 Here, we unveiled the important role of HMGB1 in the repressive effect of LXRs, in particular  
144 LXR $\alpha$ , during metabolic stress, as demonstrated by increased liver steatosis and an alteration of  
145 the hepatic insulin in hepatocyte-specific *Hmgb1* knockout (HMGB1 $\Delta^{\text{Hep}}$ ) mice subjected to either  
146 a high-fat diet (HFD) or a fasting-refeeding (F/R) challenge. *In vitro* assays further confirmed the  
147 repressive action that HMGB1 exerts on LXR $\alpha$  activity. Taken together, our data reveal a novel  
148 role of HMGB1 in alleviating liver steatosis through the repression of LXR $\alpha$  during metabolic  
149 stress.



## 150 **Results**

### 151 ***Hepatic deletion of Hmgb1 increases liver steatosis during metabolic stress.***

152 *Hmgb1* hepatocyte-specific knockout mice (HMGB1<sup>ΔHep</sup>) under chow diet (CD) feeding display  
153 no major changes in liver transcriptome and no drastic phenotype of glycogen utilization  
154 compared to control mice (HMGB1<sup>fl/fl</sup>) (29), contrasting findings from the global *Hmgb1*  
155 knockout on metabolism, possibly due to particular functions during development (28). This  
156 prompted us to clarify the precise function of HMGB1 in liver metabolism by studying the role  
157 of HMGB1 as a potential regulator of global and/or hepatic energy metabolism in adult mice  
158 using a careful characterization of HMGB1<sup>fl/fl</sup> and HMGB1<sup>ΔHep</sup> mice subjected to metabolic  
159 stress. A complete metabolic checkup in adult mice upon CD, showed that deletion of *Hmgb1* in  
160 hepatocytes (fig. S1A) did not affect circulating levels of HMGB1 (fig. S1B), serum liver  
161 enzyme levels (fig. S1C), body weight (fig. S1D), lean/fat mass ratio (fig. S1E) fasting blood  
162 glucose levels and glucose homeostasis (fig. S1F) nor generated any changes in hepatic lipid  
163 contents (fig. S1G) or in food consumption and other parameters assessed by indirect  
164 calorimetry (not shown). However, a high-throughput real-time qPCR gene expression profiling  
165 targeting metabolic pathways revealed that many key genes involved in lipid metabolism and  
166 lipogenesis, such as *Cd36*, *Fasn* or *Acly*, were upregulated in the liver of HMGB1<sup>ΔHep</sup> mice  
167 compared to HMGB1<sup>fl/fl</sup> mice (fig. S1H). Collectively, these data suggest, while supporting  
168 conclusions from a previous report (29) on the minor role of HMGB1 in systemic and liver  
169 metabolic homeostasis, that its function might become relevant in the setting of metabolic  
170 stress. To test this hypothesis, HMGB1<sup>fl/fl</sup> and HMGB1<sup>ΔHep</sup> mice were subjected to a high-fat  
171 diet feeding (HFD60%). After 12 weeks of this regimen, HMGB1<sup>fl/fl</sup> control mice showed the  
172 expected weight gain and glucose metabolism deterioration compared to mice fed CD (not  
173 shown). In this context, after HFD60%, both genotypes displayed similar weight gain (fig. S2A)  
174 and similar fat mass (fig. S2B) and shared identical physiological parameters (food intake,  
175 respiratory quotient, physical activity) (fig. S2C-E). However, HMGB1<sup>ΔHep</sup> mice exhibited a  
176 significant increase in Oil Red-O staining (**Fig. 1A**) and in liver lipid content, especially  
177 cholesterol ester, compared to control mice (**Fig. 1B**). In addition, mRNA expression analysis  
178 revealed a drastic upregulation of key genes involved in liver lipid metabolism and lipogenesis  
179 such as *Cd36*, *Fasn*, *Scd-1*, *Pnpla3*, *Adrp47* or *Lxra* (**Fig. 1C**) in livers from HMGB1<sup>ΔHep</sup> mice  
180 compared to control littermates. To further challenge the lipogenic pathway using a more acute  
181 nutritional setting without confounding effects related to a 12 week-HFD, HMGB1<sup>fl/fl</sup> and  
182 HMGB1<sup>ΔHep</sup> mice were subjected to a 6 hour-fast and an 8 hour-chow diet refeeding (F/R)  
183 experiment. Similar to HFD, hepatic lipid accumulation in HMGB1<sup>ΔHep</sup> mice was notably more

184 pronounced compared to control mice, as supported by a drastic increase of Oil Red-O staining  
185 on liver sections (**Fig. 1D**), of hepatic lipid levels (**Fig. 1E**) and lipogenic gene expression (**Fig.**  
186 **1F**) in liver biopsies from HMGB1<sup>ΔHep</sup> mice compared to HMGB1<sup>fl/fl</sup> mice. To confirm the  
187 HMGB1<sup>ΔHep</sup> mice phenotype, several other diets designed to challenge the hepatic lipogenesis  
188 were implemented, such as 24 week HFD, 8 week-choline deficient-HFD and a 12 week-high  
189 fat-high fructose diet, all showing a consistent and more severe liver steatosis in HMGB1<sup>ΔHep</sup>  
190 mice compared to HMGB1<sup>fl/fl</sup> mice (fig. S3A-C). These results indicate that under several  
191 steatosis-promoting regimens, *Hmgb1* deletion in hepatocytes is associated with a more active  
192 liver lipogenesis, suggesting that HMGB1 might play a repressive role on liver lipid synthesis,  
193 thereby preventing steatosis.

194

### 195 ***Nuclear HMGB1 represses hepatocyte lipogenesis in vivo and in vitro in a cell-autonomous*** 196 ***manner.***

197 The enhanced hepatosteatosis in HMGB1<sup>ΔHep</sup> mice may result from an increased activity of  
198 lipogenesis in the hepatocytes. To address this question, hepatic lipid synthesis was monitored  
199 *in vivo* using radiolabeled substrates upon a fasting-refeeding challenge (**Fig. 2A**). After 6  
200 hours of fasting, HMGB1<sup>fl/fl</sup> and HMGB1<sup>ΔHep</sup> mice received a bolus of <sup>3</sup>H glucose, and the <sup>3</sup>H  
201 radioisotope incorporation was quantified in the lipid fractions of several tissues after 8 hours of  
202 refeeding. Upon CD, while F/R induced a strong <sup>3</sup>H incorporation mainly in brown adipose  
203 tissue (BAT) and liver of HMGB1<sup>fl/fl</sup> mice (**Fig. 2A**), this effect was even more pronounced in  
204 HMGB1<sup>ΔHep</sup> mice, suggesting a higher capacity of *Hmgb1*-null hepatocytes to synthesize lipids  
205 after refeeding (**Fig. 2A**). In parallel, we evaluated *in vivo*, a potential disturbance of lipoprotein  
206 metabolism in HMGB1<sup>ΔHep</sup> mice upon CD and HFD. The VLDL secretion after treatment with  
207 the lipoprotein lipase inhibitor tyloxapol (**Fig. 2B**) and the activity of the microsomal  
208 triglyceride transfer protein (MTP), a key enzyme involved in lipid export (**Fig. 2C**), were both  
209 identical in HMGB1<sup>fl/fl</sup> and HMGB1<sup>ΔHep</sup> mice subjected to CD and HFD.

210 Present knowledge indicates that the regulation of hepatic lipogenesis depends on the interplay,  
211 within the liver, between hepatocytes and non-parenchymal cells and is also influenced by other  
212 tissues, mainly the adipose tissue. Therefore, we interrogated whether the increase of liver  
213 lipogenesis in HMGB1<sup>ΔHep</sup> mice could be cell-autonomous. To address this point, primary  
214 hepatocytes were isolated from HMGB1<sup>fl/fl</sup> and HMGB1<sup>ΔHep</sup> mice and lipogenic activity was  
215 assessed *in vitro* using the same strategy as described above for the *in vivo* study. Consistent  
216 with the *in vivo* data, after isolation from mice under CD, cultured HMGB1<sup>ΔHep</sup> hepatocytes  
217 displayed an increased lipogenic activity compared to HMGB1<sup>fl/fl</sup> hepatocytes (**Fig. 2D**).

218 However, lipogenesis was stimulated to the same extent by insulin (**Fig. 2D**) in hepatocytes  
219 from both genotypes. Interestingly, when isolated from HFD-fed mice, HMGB1<sup>ΔHep</sup>  
220 hepatocytes still exhibited a higher lipogenic activity compared to HMGB1<sup>fl/fl</sup> hepatocytes (**Fig.**  
221 **2E**) and insulin slightly increased the lipogenesis independently of the genotypes. Importantly,  
222 palmitate oxidation was also measured in primary hepatocytes from both genotypes, and no  
223 difference in lipid utilization was observed neither upon CD (**Fig. 2F**) nor HFD (**Fig. 2G**).  
224 Collectively, these results suggest that HMGB1 represses lipogenesis in hepatocytes in a cell  
225 autonomous-manner, without affecting FA oxidation.

226

### 227 *Hepatic deletion of Hmgb1 affects specifically liver insulin sensitivity.*

228 Studies have reported a strong correlation between hepatic lipid accumulation and a decreased  
229 insulin sensitivity in the liver (30). Therefore, we next monitored whether the liver steatosis  
230 induced by hepatocyte *Hmgb1* deletion has any effect on glucose homeostasis and/or insulin  
231 signaling in mice subjected to a HFD60%. Upon HFD both HMGB1<sup>fl/fl</sup> and HMGB1<sup>ΔHep</sup>,  
232 displayed a similar glucose homeostasis and global insulin sensitivity (**Fig. 3A-C**), albeit a  
233 slight trend toward a higher AUC after oral glucose test tolerance was observed in HMGB1<sup>ΔHep</sup>  
234 mice (**Fig. 3A**). Of note, insulin levels either after starvation or after a bolus of glucose were  
235 similar between both groups (**Fig. 3B**), ruling out that hepatic *Hmgb1* deletion may interfere  
236 with insulin secretion. Interestingly HMGB1<sup>ΔHep</sup> mice displayed a higher glycaemia after 14  
237 hours starvation (**Fig. 3D**), corroborated by a higher AUC during a pyruvate tolerance test  
238 compared to HMGB1<sup>fl/fl</sup> mice (**Fig. 3E**), suggesting an increased hepatic glucose production  
239 consistent with a potential hepatic insulin resistance. In addition, liver glycogen content was  
240 lower in HMGB1<sup>ΔHep</sup> mice as shown by the PAS coloration (**Fig. 3F-G**) supporting a  
241 compromised glycogen synthesis. All together these data show that the increased  
242 hepatosteatosis in HMGB1<sup>ΔHep</sup> mice is associated with a noticeable perturbation of insulin  
243 signaling. This was confirmed by the lower level of AKT phosphorylation, recognized as a  
244 classic downstream effector of the insulin receptor, in the liver of HMGB1<sup>ΔHep</sup> mice subjected to  
245 a 12 week-HFD, compared to HMGB1<sup>fl/fl</sup> mice (**Fig. 3H**). To functionally test a possible  
246 alteration of insulin sensitivity in absence of hepatocyte *Hmgb1*, HMGB1<sup>fl/fl</sup> and HMGB1<sup>ΔHep</sup>  
247 mice subjected to CD or a long term HFD (24 weeks- as the global insulin signaling is more  
248 perturbed compared to a 12 week-HFD) were challenged with an acute injection of insulin  
249 (0.75U/kg) or saline (**Fig. 3I**). In CD-fed mice of both genotypes, we observed no differences in  
250 the insulin-induced phosphorylation of AKT, compared to saline conditions (fig. S2F). In HFD-  
251 fed mice, insulin injection induced the expected phosphorylation of AKT in the liver, adipose

252 tissue and skeletal muscle (**Fig. 3I**) in control mice, but remarkably the amount of p-AKT was  
253 much lower selectively in liver samples harvested from HMGB1<sup>ΔHep</sup> mice, compared to skeletal  
254 muscle and adipose tissue (**Fig. 3I**). Collectively these data show a selective impact of  
255 hepatocellular HMGB1 deficiency on liver insulin signaling upon long term-HFD feeding.

256  
257 ***The signaling of LXR is enhanced in the absence of Hmgb1.***

258 To unveil the signaling pathways regulated by HMGB1, we performed gene expression  
259 profiling using cDNA microarray of HMGB1<sup>fl/fl</sup> and HMGB1<sup>ΔHep</sup> liver samples from mice  
260 subjected to a 12 week-HFD regimen or a F/R challenge (**Fig. 4**). Microarray analysis and  
261 unsupervised clustering displayed on the heatmaps showed that deletion of *Hmgb1* caused  
262 significant changes in the liver transcriptome (**Fig. 4A**, fig. S4A-B). Venn diagrams revealed  
263 that in liver samples from HMGB1<sup>ΔHep</sup> mice, there were 295 up- and 471 down-regulated genes  
264 upon HFD and 125 up- and 380 down-regulated genes after F/R (**Fig. 4B**). Of note, as displayed  
265 in the Venn diagram (**Fig. 4B**), 253 genes (roughly 25%) of the identified genes are similarly  
266 regulated in both challenges (HFD and F/R). Hierarchical clustering method showed that the  
267 vast majority of these genes are subjected to the same type of variations in both conditions (**Fig.**  
268 **4C**) suggesting that these groups of genes belong to pathways under robust regulation by  
269 *Hmgb1*. The enrichment analysis of these 253 common genes, using the EnrichR database,  
270 indicated that among all gene ontology (GO) terms represented in HMGB1<sup>ΔHep</sup> livers, the most  
271 enriched GO terms were “metabolism of lipids” and “metabolism” (**Fig. 4D-E**), confirming our  
272 histological findings. Based on the analysis of the gene network using the Reactome database,  
273 numerous genes regulated by HMGB1 in both nutritional conditions, are connected to  
274 metabolism functions, and more specifically, to lipid metabolism (**Fig. 4F**). We then narrowed  
275 our focus on gene clusters involved in these identified GO terms, and further performed analysis  
276 on potential upstream regulators involved, by using EnrichR database (**Fig. 4G**). Interestingly,  
277 among the identified transcription factors, LXR and PPAR $\gamma$  came up with the highest score.  
278 LXR $\alpha$  and PPAR $\gamma$  are well known for their critical pro-lipogenic activity in the liver, which is  
279 in line with the phenotype displayed by the HMGB1<sup>ΔHep</sup> mice (**Fig. 1**).

280 Collectively our unbiased transcriptomic study indicated that in the liver upon metabolic stress,  
281 HMGB1 might repress the expression of gene clusters partly controlled by LXR $\alpha$  and PPAR $\gamma$   
282 and involved in hepatic lipid synthesis.

283  
284  
285

286 ***Exaggerated hepatic steatosis in the Hmgb1-null liver is dependent on LXRA activity.***

287 As LXRA is a key lipogenic transcription factor involved in cholesterol metabolism and liver  
288 lipogenesis, the potential de-repression of its activity induced by HMGB1 deletion could  
289 translates into liver steatosis (31, 32). However, it is less clear whether PPAR $\gamma$  is a significant  
290 trigger of liver steatosis. The role of PPAR $\gamma$  in HFD-induced hepatosteatosis is supported by  
291 several reports (33, 34), but no studies have investigated its potential role during F/R-induced  
292 liver steatosis. To clarify this, we subjected mice carrying hepatocyte specific-*Ppar $\gamma$*  deletion to  
293 F/R challenge, and the results show no major contribution of hepatocyte PPAR $\gamma$  to the  
294 progression of F/R-induced liver steatosis (fig. S5) based on liver body weight ratio, Oil Red-O  
295 staining, neutral lipid profile or mRNA expression of hepatic steatosis markers (fig. S5A-D).  
296 This suggests that PPAR $\gamma$ , *per se*, is not a determinant trigger of hepatic lipogenesis, and  
297 therefore its potential contribution in the severe steatosis displayed in HMGB1 $^{\Delta\text{Hep}}$  mice is likely  
298 minor.

299 Subsequently, we focused on the functional interdependence between HMGB1 and LXRA,  
300 examining the effect of pharmacological activation and adenovirally-mediated inhibition of  
301 LXRA in HMGB1 $^{\text{fl/fl}}$  and HMGB1 $^{\Delta\text{Hep}}$  mice (**Fig. 5**). To establish a possible causal link between  
302 the absence of HMGB1 and LXRA activity, the HMGB1 $^{\text{fl/fl}}$  and HMGB1 $^{\Delta\text{Hep}}$  mice were treated  
303 with a synthetic LXR agonist (T0901317) for four consecutive days (30mg/kg-*per os*) (**Fig. 5A-**  
304 **B**, fig. S6A). Remarkably, already before treatment, several LXRA dependent genes (*Srebf1*,  
305 *Fasn*, *Elovl-6*, *Abcg5*, and *Abcg-8*) were up-regulated in the HMGB1 $^{\Delta\text{Hep}}$  livers (**Fig. 5A**). As  
306 expected, T0901317 treatment of HMGB1 $^{\text{fl/fl}}$  mice potently induced expression of LXR  
307 dependent genes (*Srebf1*, *Fasn*, *Elovl-6*, *Scd-1*, *Abcg5*, *Abcg-8*) in the liver compared to vehicle  
308 treated HMGB1 $^{\text{fl/fl}}$  mice. Importantly, HMGB1 $^{\Delta\text{Hep}}$  livers displayed a significantly higher  
309 response to T0901317 than HMGB1 $^{\text{fl/fl}}$  mice, with an enhanced expression of *Fasn*, *Elovl-6*,  
310 *Abcg-5* and *Abcg-8* (**Fig. 5A** and fig. S6A). This higher response was corroborated by  
311 histological examination showing an increased Oil Red-O staining in *Hmgb1* deleted livers in  
312 mice subjected to the T0901317 treatment (**Fig. 5B**). Taken together these results indicate that  
313 the higher lipogenesis in HMGB1 $^{\Delta\text{Hep}}$  livers is likely due to an enhanced LXRA activity. To  
314 complement this study, and firmly establish the role of LXRA in the enhanced hepatic steatosis  
315 seen in HMGB1 $^{\Delta\text{Hep}}$  mice, we silenced LXRA expression *in vivo*, using an adenovirus  
316 expressing shRNA targeting the receptor (Ad-Sh*Lxra*) (**Fig. 5C-D** and fig. S6B-C). Seven days  
317 after viral infection, the hepatic LXRA, but not  $\beta$ , mRNA levels were reduced showing that  
318 expression of LXRA, as long as LXRA –dependent genes, were successfully blunted in Ad-  
319 Sh*Lxra* injected animals compared to control animals injected with an adenovirus expressing a



320 scrambled shRNA (Ad-Sh*SCR*), highlighting the potency and specificity of LXR $\alpha$  targeting  
321 (fig. S6B-C). Consistent with the results presented above, Ad-sh*SCR* treated HMGB1 $^{\Delta\text{Hep}}$  mice  
322 displayed increased hepatic steatosis compared to Ad-sh*SCR* injected HMGB1 $^{\text{fl/fl}}$  mice either  
323 upon F/R (**Fig. 5C**) or HFD feeding (**Fig. 5D**) as shown by Oil Red-O staining. And  
324 remarkably, Ad-sh*Lxra* treatment lowered drastically hepatic steatosis in both groups of animals  
325 (**Fig. 5C-D**), suggesting that LXR $\alpha$  plays a major role in the enhanced hepatic lipid synthesis of  
326 HMGB1 $^{\Delta\text{Hep}}$  mice. In summary, these results suggest that the LXR $\alpha$  activity is responsible for  
327 the enhanced hepatic lipid synthesis in *Hmgbl*-null livers and support a repressive role of  
328 HMGB1 on hepatic lipogenesis through repression of LXR $\alpha$  activity.

### 329 330 ***HMGB1 binds to LXR $\alpha$ target genes involved in lipogenesis.***

331 Having identified LXR $\alpha$  as potential targets for repression by HMGB1, we determined the  
332 molecular mechanisms by which HMGB1 is exerting this action. Considering the impact  
333 HMGB1 may have on chromatin compaction (22), we first performed an assay for transposase-  
334 accessible chromatin using high throughput sequencing (ATAC-seq) to evaluate the global  
335 chromatin dynamics in the absence of hepatic-HMGB1. Hepatocyte nuclei were purified from  
336 liver samples harvested from HMGB1 $^{\text{fl/fl}}$  and HMGB1 $^{\Delta\text{Hep}}$  mice upon CD feeding or after FR  
337 (fig. S7). Remarkably, at basal state the principal component analysis (PCA) analysis of the  
338 ATAC-seq peaks revealed no distinct pattern in chromatin states between both genotypes (fig.  
339 S7A), in reads alignment in a genome browser (fig. S7B) or in the open chromatin regions  
340 (OCR) locations around transcription start sites (TSS) (fig. S7C). In sharp contrast, F/R in  
341 HMGB1 $^{\text{fl/fl}}$  mice triggered significant changes in chromatin state compared to the CD condition  
342 (respectively 68776 vs. 47725 OCRs), but similar modifications were detected in the liver  
343 chromatin from F/R HMGB1 $^{\Delta\text{Hep}}$  mice. Strikingly, only 4 OCRs were differentially  
344 nucleosome-depleted between both genotypes supported by the very high number of common  
345 aligned peaks (fig. S7D). PCA analysis, examination of TSS charts and annotation chart-pie  
346 confirmed the high similarity in the chromatin state of both libraries (fig. S7E-G). A close  
347 visualization of aligned peaks in loci of lipogenic genes regulated by LXR $\alpha$  (*Srebf1*, *Scd-1*,  
348 *Cidec* or *Fasn*) (fig. S7H) showed as expected the same chromatin state pattern between both  
349 genotypes. As presumed from this very low number of sites differentially opened in the  
350 chromatin between control and *Hmgbl* null-livers, enrichment analysis could not identify any  
351 statistically significant biological functions related to these modifications. Overall the analysis  
352 of ATAC-seq datasets ruled out a putative model where HMGB1 may regulate hepatic lipid  
353 metabolism through chromatin packaging.

354 Next we sought to determine, using chromatin immuno-precipitation combined with high-  
355 throughput sequencing (ChIP-sequencing), whether HMGB1 might exert its activity on gene  
356 transcription directly through its abilities to bind DNA. We first set up a reliable and robust  
357 ChIP protocol on cells *in vitro*, as HMGB1 ChIPing might be challenging (26) (fig. S8A-C).  
358 Then, using frozen liver samples, we examined HMGB1 binding genome-wide in HMGB1<sup>fl/fl</sup>  
359 under CD, HFD, and after F/R (**Fig.6** and fig. S8-S9). Of note, HMGB1 ChIP-seq was also  
360 performed on HMGB1<sup>ΔHep</sup> livers and these datasets were used as negative control to determine  
361 non-specific signals. These background peaks were subtracted in libraries from HMGB1<sup>fl/fl</sup>  
362 livers (fig. S8D-F). Under CD feeding condition, 201250 peaks were detected on the whole  
363 genome that were predominantly located in promoters (18.5%), introns (29.3%) and intergenic  
364 regions (32.6%) (fig. S9A). Interestingly only 155854 and 32006 peaks were detected under the  
365 F/R or HFD conditions, respectively, suggesting a significant remodeling of the HMGB1  
366 binding pattern during metabolic stress, even though the qualitative binding remains nearly the  
367 same (fig. S9A). The PCA plot of **Figure 6A** demonstrates significant global differences in  
368 HMGB1 DNA occupancy between CD versus F/R and HFD. Venn diagram confirmed this  
369 trend with only a few peaks (8859) detected in common in the three conditions (**Fig. 6B**). The  
370 genome browser view of chromosome 3, 12 and 14 exemplified the drastic repositioning of  
371 HMGB1 upon nutritional stress (**Fig. 6C**). Along the same lines of observation, partitioning of  
372 HMGB1-bound sites by distance to TSSs confirmed the severe change in DNA occupancy of  
373 HMGB1. Importantly, the results suggested that most HMGB1 sites located around the TSSs  
374 (+/- 3000 bp) under CD feeding were not used under the F/R or HFD conditions (**Fig. 6D**).  
375 Enrichment analysis based on peaks differentially called in CD vs HFD feeding (**Fig. 6E**) and  
376 CD vs F/R (**Fig. 6F**) revealed that among several biological functions (GO categories), two are  
377 remarkably related to lipid metabolism as the “integration of energy metabolism” and  
378 “phospholipid metabolism” (**Fig. 6E-F**). In these two GO categories, 134 genes displayed a  
379 very high occupation rate upon CD compared to F/R and HFD and nearly 90% of these genes  
380 displayed a lower occupancy of HMGB1 in both challenges when compared to CD. These  
381 results suggest a common mechanism of regulation in F/R and HFD (**Fig. 6G**, full list in **Table**  
382 **S1 and Table S2**). To gain insight into the gene expression program regulated by HMGB1, we  
383 performed a motif identification analysis on 134 genes unveiled by the enrichment analysis. The  
384 oPOSSUM-3 motif tool revealed the binding motifs of the transcription factors of LXR,  
385 identifying this nuclear receptor among the top regulators (**Fig. 6H**). To functionally test  
386 whether the HMGB1 occupancy rate would have an incidence on the level of gene expression,  
387 we went back to the microarray data to measure the expression of the 134 genes identified in the



388 enrichment analysis performed above. Out of the 134 genes, 70 and 78 are up-regulated in HFD  
389 and F/R, respectively, in livers from HMGB1<sup>ΔHep</sup> mice compared to HMGB1<sup>fl/fl</sup> mice (**Fig. 6I-J**)  
390 providing evidence for a negative correlation between the HMGB1 DNA occupation and the  
391 expression of metabolic related-genes identified in the ChIPseq. These data demonstrate that  
392 HMGB1 may play a suppressive action on LXR $\alpha$  activity and, consequently, on the level of  
393 expression of its target genes.

394 Taken together, our data are in support of a model whereby at basal state (CD), HMGB1 binds  
395 to chromatin loci to modulate the transcription of a number of genes controlled by LXR $\alpha$  which  
396 are particularly involved in energy metabolism and lipogenesis.

397

### 398 ***In vitro*, HMGB1 exerts a repressive action on LXR $\alpha$ .**

399 Since HMGB1 modulates chromatin structure and, therefore, regulates transcription factor  
400 activity, we examined whether HMGB1 could inhibit LXR $\alpha$  transcriptional activation in  
401 cultured cells transfected with luciferase reporter genes harboring LXR response elements  
402 (LXRE). Expression of HMGB1 dramatically decreased LXR $\alpha$  transcriptional activity already  
403 at basal state but also after pharmacological activation by synthetic LXR (T093911) or RXR  
404 (LG268) agonists (**Fig. 7A**). Next, we tested whether HMGB1 directly interacts with LXR $\alpha$  *in*  
405 *vitro* co-immunoprecipitation assays (**Fig. 7B**) but no interaction could be detected between a  
406 flagged Myc-HMGB1 and HA-LXR $\alpha$  (**Fig. 7B**). These *in vitro* assays help to firmly establish  
407 that HMGB1 is capable of potently repress LXR $\alpha$  activity at basal state but also upon  
408 pharmacological activation, but without any direct physical interaction. Therefore, we tested  
409 whether HMGB1 mediated-inhibition of LXR activity may occur through suppressing LXR  
410 interaction with the DNA encoding LXR target genes. The ChIP sequencing data suggested that  
411 the localization of HMGB1 at specific gene loci correlated with its repressive role of LXR  
412 target genes such as *Acly* or *Fasn*. These two loci were significantly enriched in CD (green  
413 tracks) compared to HFD (purple tracks) and F/R (red tracks) (**Fig. 7C-D**). Interestingly,  
414 HMGB1 bound across the whole loci (**Fig. 7C-D**) and the promoters of the two HMGB1  
415 repressed genes, *Acly* or *Fasn* displayed a heterogeneous HMGB1 occupation patterns (fig.  
416 S9B-C), with *Acly* promoter displaying a high occupation rate in the TSS as opposed to *Fasn*  
417 promoter (fig. S9B-C). This suggests that HMGB1 is not exerting its repressive effect only  
418 through TSS occupation. This prompted us to extend the analysis to a series of key genes  
419 involved in lipogenesis by performing RT-qPCR experiments on liver samples from adult  
420 HMGB1<sup>fl/fl</sup> and HMGB1<sup>ΔHep</sup> mice fed with CD, a condition under which HMGB1 repression  
421 was strong. The results showed a consistent up-regulation in the expression level of key

422 lipogenic genes when HMGB1 was lacking in livers of HMGB1<sup>ΔHep</sup> mice. The expression of  
423 direct LXRα target genes such as *Srebfl*, *Scd-1*, *Abcg-5* or *Abcg-8* and indirect target genes  
424 such as *Cd36*, *Cidec*, *Pnpla3* or *Fasn* (**Fig. 7E**) was increased in the liver of these mice  
425 compared to their floxed littermates. To establish a causal link between the nuclear presence of  
426 HMGB1 and the mRNA expression level of the above-mentioned genes, we deleted HMGB1  
427 selectively in hepatocytes using the hepatocyte-specific promoter of the thyroxine-binding  
428 globulin (TBG) gene to express the Cre-recombinase via an AAV8-vector (AAV8-TBG-Cre) in  
429 adult HMGB1<sup>fl/fl</sup> mice. This strategy was validated by the lower levels of HMGB1 mRNA and  
430 protein levels detected in the liver of AAV8-TBG-Cre expressing mice compared to the control  
431 group (fig. S10A-B). Remarkably seven days post viral infection with the recombinant virus,  
432 the reduced *Hmgbl* expression resulted in up-regulation of a vast majority of LXRα responsive  
433 genes, similarly to what is seen in liver of mice with a constitutive *Hmgbl* deletion in  
434 hepatocytes (**Fig. 7F**) This result supports a causal and repressive role for HMGB1 on the level  
435 of expression of this subset of genes. Overall, these findings support that HMGB1 is repressing  
436 LXRα transcriptional activity, which is not mediated by a direct physical interaction with the  
437 receptor but rather through a complex DNA occupation across the LXRα responsive gene loci.

438

## 439 **Discussion**

440 Lipogenesis is a fundamental function of the liver to regulate and buffer the amount of  
441 circulating lipids, which could present a risk of cellular toxicity in the long run, for numerous  
442 tissues (35). Hepatic lipogenesis is therefore tightly regulated by a large number of factors,  
443 including TFs and nuclear proteins that together manage positive and repressive actions on gene  
444 transcription. These regulatory processes and their interplay are complex and only partly  
445 understood and have high relevance due to the high world-wide prevalence of NAFLD (1).  
446 Herein, we unraveled a new mechanism regulating liver lipogenesis involving the nuclear factor  
447 HMGB1. Using both constitutive and induced knockouts of *Hmgbl* gene selectively in  
448 hepatocytes, we demonstrated that HMGB1, acting in the nucleus, exerts a potent repressive  
449 effect on LXRα activity and hepatic lipogenesis during metabolic stresses, such as F/R or HFD  
450 feeding, suggesting a protective role on the development of NAFLD.

451 The nuclear role of HMGB1 might be more complex than initially envisioned and may  
452 depend on cell type, nature of environmental signals, and the pathophysiological context. In the  
453 context of metabolic stress, we demonstrate *in vitro*, using primary culture of hepatocyte, that  
454 HMGB1 exerts its repressive effect on lipid metabolism in a cell-autonomous manner, thus  
455 supporting a model where HMGB1 remains inside the hepatocyte. One can presume that either

456 HMGB1 stays in the nucleus and/or translocates in the cytoplasm. Our ChIP-seq data clearly  
457 showed that upon the nutritional challenges we have applied, HMGB1 leaves the chromatin,  
458 exemplified by reduced binding affinity to DNA and loss of TSS occupancy, triggering a  
459 number of changes in gene transcription. Other studies have described a similar impairment of  
460 DNA affinity by HMGB1 in cells subjected to stress (26, 40). In a recent study, it was shown  
461 that in senescent cells, HMGB1 leaves the nucleus leading to a significant change in gene  
462 expression (mostly up-regulation) and in chromatin topology (26), which is in agreement with  
463 our results in hepatocytes. Despite being poorly documented, it has also been described that  
464 HMGB1 in the nucleus may both be bound and unbound to DNA, and that even when unbound  
465 it may still reside within the nucleus during cell cycle (40). This supports a model where upon  
466 stressors or outside signals, HMGB1 may dissociate from DNA but stays in the nucleus. Yet,  
467 the precise mechanisms regulating this biological event and the role of unbound HMGB1 within  
468 the nucleus remain unknown, and further experiments are required to understand the underlying  
469 mechanism. At the same time, the channeling of HMGB1 between nucleus and cytoplasm is  
470 determined by a variety of post-translational modifications such as acetylation, methylation or  
471 phosphorylation. During inflammatory challenges for example, acetylation has been described  
472 to regulate the accessibility of the HMGB1 nuclear localization signal to the cargo proteins, thus  
473 balancing the protein pool between nucleus and cytoplasm (37). In the context of a metabolic  
474 stress, it has been suggested that the histone deacetylase SIRT1, a key metabolic sensor (41),  
475 may play a significant role in the acetylation status of HMGB1 and its sub-cellular localization  
476 (42).

477 Our data suggest that in response to micro-environmental signals, HMGB1 may  
478 dissociate from the chromatin thus affecting biological functions, including metabolic  
479 processes. On CD, we found HMGB1 occupying 134 gene loci belonging to metabolic  
480 functions, which have been identified as depending on the activity of LXR $\alpha$ . As LXR $\alpha$  is a key  
481 lipogenic transcription factor involved in cholesterol metabolism and liver lipogenesis, the de-  
482 repression of its activity induced by HMGB1 deletion logically translates into liver steatosis  
483 (31, 32). The molecular mechanism behind the inhibition of the hepatic lipogenesis by HMGB1  
484 is still not entirely clear. The immediate mechanism and the simplest scenario would be a direct  
485 or indirect binding of HMGB1 with LXR $\alpha$ , even though a direct physical interaction was not  
486 seen in our co-immunoprecipitation assay (**Fig. 7B**). One cannot rule out that using more  
487 sensitive techniques, a physical interaction might be found as a physical interactions of HMGB1  
488 with transcription factors have been described, notably sterol regulatory element-binding  
489 proteins (SREBPs) and the glucocorticoid receptor (GR) (24, 25). Study of the HMGB1-

490 interactome in hepatocytes *in vivo* might be interesting to explore, albeit technically  
491 challenging.

492 Our ATAC-seq data helped to demonstrate that chromatin compaction was not regulated  
493 by HMGB1 under CD and during the nutritional challenges (fig. S7), suggesting that the  
494 HMGB1-mediated repression was likely not mediated through a nucleosomal re-organization.  
495 This hypothesis was important to test, as several reports demonstrated a key role of HMGB1 in  
496 the nucleosome arrangement remodeling associated to transcription modulation *in vitro* (22). At  
497 least in the *in vivo* context of liver steatosis, our results support a minor role for HMGB1 in  
498 regulating nucleosomal landscapes, which represents a significant layer of epigenetic control of  
499 transcription. However, our ChIP-seq data suggested DNA occupancy as a likely mechanism of  
500 repression. HMGB1 has a very high level of DNA occupation in the basal state and that it is  
501 located equally in the promoter region, CDS and distal intergenic region. However, upon  
502 metabolic stress, HMGB1 appears to leave the chromatin, particularly the TSS regions (**Fig.**  
503 **7C**). This suggests that HMGB1 DNA occupancy is correlated with changes in gene  
504 transcription, but interestingly, the occupancy rate in the TSS is not necessarily related to the  
505 level of repression, as shown by two equally-repressed genes (*Acly* and *Fasn*) with  
506 heterogeneous TSS occupation (fig. S9B-C). Hence, occupancy appears to be an important  
507 factor, but likely not the only one. Of note, our data using inducible *Hmgbl* deletion via AAV8-  
508 TBG-Cre show that the absence of HMGB1 consistently leads to the up-regulation of genes  
509 involved in hepatic lipogenesis, suggesting a causal relationship between HMGB1 and gene  
510 expression (**Fig. 7E-F**). These results are corroborated by a study of Sofiadis et al, depicting a  
511 map of HMGB1 binding genome-wide in senescent cells using a combination of RNA-seq,  
512 ChIP-seq and Hi-C (chromatin conformation capture). Interestingly, in primary cells at  
513 senescent state, HMGB1 leaves the chromatin, triggering profound changes in chromatin  
514 dynamics and gene transcription, in a similar fashion as seen by us. Additionally, Hi-C data  
515 demonstrated that HMGB1 binds to TAD (Topology Associated Domain) boundaries, known to  
516 regulate chromatin topology and consequently gene expression. In addition to this paper, a  
517 recent study has also evoked an RNA-binding property as a another functional layer for  
518 HMGB1 to regulate gene expression (26, 43). Therefore, 3-D conformation and RNA binding  
519 clearly represent additional mechanisms by which HMGB1 could mediate its repressive effect  
520 on LXR $\alpha$ , which is therefore worthwhile to further investigate in the context of liver steatosis.

521 Overall our study helped to uncover HMGB1-mediated LXR $\alpha$  repression as new  
522 mechanism modulating liver lipogenesis during metabolic stress. Boosting these functions of

523 HMGB1 may constitute a new therapeutic approach to counteract the deleterious effect of  
524 enhanced LXR $\alpha$  activity in patients with NAFLD.

525

## 526 **Materials and Methods**

### 527 **Experimental Design**

528 This study aimed to decipher the precise role of the nuclear factor HMGB1 in hepatocytes  
529 during metabolic stress. For this, a cell specific knockout mice model where *Hmgb1* gene is  
530 deleted specifically in hepatocytes (HMGB1 $\Delta^{\text{Hep}}$ ) and its control counterpart (HMGB1 $^{\text{fl/fl}}$ ) were  
531 subjected to nutritional stress such as high fat diet and fasting/refeeding. A combination of  
532 OMICS studies has been employed to nail down the potential mechanism behind HMGB1  
533 repressive effect on hepatic lipogenesis such as microarray, ATAC-seq or ChIP-seq. All studies  
534 identified lipid metabolism as a key function and transcription factor LXR $\alpha$  as a key piece that  
535 might be repressed by HMGB1. *In vivo* studies using adenovirus-mediated shRNA expression  
536 targeting LXR $\alpha$  were employed to functionally test the interdependence of HMGB1 and LXR $\alpha$ .  
537 *In vitro* assays were used to measure how HMGB1 could regulate the transcriptional activation  
538 using specific responsive elements (RE)-containing luciferase reporter. For *in vivo* studies, adult  
539 age-matched Cre +/- carrying *Hmgb1* floxed gene called HMGB1 $\Delta^{\text{Hep}}$  mice and their control  
540 Cre -/- carrying *Hmgb1* floxed gene named HMGB1 $^{\text{fl/fl}}$  littermates were co-housed to reduce  
541 variability. Animal numbers for each study type were determined by the investigators on the  
542 basis of data from previous similar experiments or from pilot studies. For OMICS studies,  
543 displayed animals were chosen as representative from the whole cohort: (i) for the microarray 4  
544 animals per genotype/per challenge, (ii) 2 animals per genotype/per challenge for the Chip-seq  
545 and (ii) 2 animals per genotype/per challenge for the ATAC-seq have been analyzed. For  
546 neutral lipid analysis and histology experiments, sample identities were not known in most  
547 cases and were randomized. For *in vitro* studies, at least three biological replicates were used in  
548 three separate experiments.

549

### 550 **Mouse Phenotyping**

551 Breeding and experimental procedures were performed in accordance with institutional  
552 guidelines for animal research and were approved by the Animal Care and Use Ethics  
553 Committee US006 CREFRE - CEEA-122 (protocol 17/1048/03/20). Animals were housed in  
554 temperature and humidity controlled facilities under a 12 hour-light period with free access to  
555 food and water. All animals were aged between 2 to 3 months at the beginning of the  
556 experimentations. Hepatocyte-specific deletion of *Hmgb1* gene noted HMGB1 $\Delta^{\text{Hep}}$  were

557 generated crossing Alb-CRE<sup>+/-</sup> (Jackson Laboratory, Ban Harbor, ME, USA) with *Hmgb1*  
558 floxed mice noted HMGB1<sup>fl/fl</sup> (a generous gift from Dr. Robert F. Schwabe, Columbia  
559 University, NY, USA), littermates Alb-CRE<sup>-/-</sup> HMGB1<sup>Flox/Flox</sup> (HMGB1<sup>fl/fl</sup>) were used as  
560 control. Hepatocyte-specific deletion of *Pparγ* gene noted PPAR $\gamma^{\Delta\text{Hep}}$  were generated crossing  
561 Alb-CRE<sup>+/-</sup> (Jackson Laboratory, Ban Harbor, ME, USA) with *Pparγ* floxed mice noted  
562 PPAR $\gamma^{\text{fl/fl}}$  (a generous gift from Pr. W.A Wahli, University of Lausanne, Switzerland),  
563 littermates Alb-CRE<sup>-/-</sup> PPAR $\gamma^{\text{Flox/Flox}}$  (PPAR $\gamma^{\text{fl/fl}}$ ) were used as control. At the time of sacrifice,  
564 tissues and organs were dissected, weighted and directly snap frozen in liquid nitrogen and  
565 stored at -80°C.

566

### 567 **Genotyping**

568 DNA extraction and PCR were performed using Kapa mouse genotyping kit (Kapa Biosystems,  
569 Wilmington, MA, USA) according to the manufacturer protocol. PCR reactions were performed  
570 using following primers: Alb-CRE: 5'-ACCGGTCGATCGAAACGAGTGATGAG-3' (forward)  
571 and 5'-AGTGCGTTCGAACGCTAGAGC-3' (reverse), LoxP1 5'-  
572 TAAGAGCTGGGTAAACTTTAGGTG-3' (forward) and 5'-  
573 GAAACAGACAAGCTTCAAAGTCTGCT-3' (reverse), LoxP2 5'-  
574 TGACAGGATACCCAGTGTTAGGGG-3' (forward) and 5'-  
575 CCAGAGTTTAATCCACAGAAGAAA-3' (reverse).

576

### 577 **Interventional experiments**

578 -For diet induced-obesity experiments, mice were fed with a normal chow diet (CD, Research  
579 Diets, New Brunswick, NJ, USA) or a high fat diet (HFD60%, Research Diets, New Brunswick,  
580 NJ, USA) for 12 or 24 weeks. To induce liver steatosis, mice were subjected to HFD60% with  
581 30% fructose (Sigma-Aldrich, Saint Louis, MO, USA), dissolved in the drinking water or  
582 choline deficient diet supplemented with 60% fat (CD-HFD60%, Research Diets, New  
583 Brunswick, NJ, USA). For the fasting-refeeding, mice under normal chow diet (CD) were  
584 starved 6 hours from Zeitgeber 14 (ZT14) and refeed for 8 hours with the CD and 20% glucose  
585 (Sigma-Aldrich, Saint Louis, MO, USA) in the drinking water.

586 -Body composition was assessed using the EchoMRI (Echo Medical Systems, Houston, TX,  
587 USA).

588 -Indirect calorimetry was performed after 24 h of acclimatization in individual cages. Oxygen  
589 consumption, carbon dioxide production, and food and water intake were measured  
590 (Phenomaster; TSE Systems, Bad Homburg v.d.H, Germany) in individual mice at 15-min



591 intervals during a 24-h period at constant temperature (22°C). The respiratory exchange ratio  
592 ([RER] =  $V_{CO_2}/V_{O_2}$ ) was measured. The glucose oxidation (in g/min/kg<sup>0.75</sup> =  $[(4.545 \times V_{CO_2}) -$   
593  $(3.205 \times V_{O_2})]/1000$ ) and lipid oxidation (in g/min/kg<sup>0.75</sup> =  $[1.672 \times (V_{O_2} - V_{CO_2})]/1000$ ) were  
594 calculated. Ambulatory activities of the mice were monitored by infrared photocell beam  
595 interruption (Sedacom; Panlab-Bioseb).

596 -For *Hmgb1* gene deletion at adult age, HMGB1<sup>fl/fl</sup> male mice at 8 weeks of age were injected  
597 intravenously (i.v) with 10<sup>11</sup> genomic copies per mouse with adeno-associated-virus (AAV8)  
598 containing a liver-specific promoter, thyroxine-binding globulin (TBG) promoter driving either  
599 GFP or Cre recombinase (Penn Vector Core, University of Pennsylvania, PA, USA) to generate  
600 control mice noted AAV-GFP or liver specific HMGB1 knockout noted AAV-CRE. 7 days  
601 after injections, animals were euthanized.

602 - To knockdown LXR, adult male HMGB1<sup>fl/fl</sup> and HMGB1<sup>ΔHep</sup> mice (8-12 week-old) were  
603 injected i.v with an adenovirus expressing an shRNA targeting LXRα (kindly provided by Dr  
604 Catherine Postic, Cochin Institute, Paris, France). For both adenovirus protocols, 10<sup>13</sup>  
605 adenoviral infectious particles were diluted in 0.9% NaCl and administered in a total volume of  
606 100 μl per animal. 7-10 days after injection, control (scramble RNA noted shSCR) and shLXRα  
607 expressing mice were subjected to fasting/refeeding challenges as described previously. To  
608 study HFD-induced liver steatosis, mice were first subjected to a 4 week-HFD60%, then  
609 injected with shSCR and shLXRα, and mice were euthanized 7-10 post injections.

610 -For Insulin acute injection, CD or HFD60% fed HMGB1<sup>fl/fl</sup> and HMGB1<sup>ΔHep</sup> mice were fasted  
611 for 16 hours and then injected i.p (intra-peritoneal) with 0,75U/kg of human insulin and mice  
612 were sacrificed 15 minutes later.

613 -For LXR *in vivo* activation, synthetic agonist T0901317 (30mg/kg, Bertin Bioreagent,  
614 Montigny le Bretonneux, France) was administered orally by four consecutive daily gavages on  
615 8-week-old HMGB1<sup>fl/fl</sup> and HMGB1<sup>ΔHep</sup> adult male mice. Mice were starved one hour before  
616 the fourth gavage, and maintained starved for 5 more hours before euthanasia.

617 - For hepatic VLDL-triacylglycerol production assay, 8-week-old HMGB1<sup>fl/fl</sup> and HMGB1<sup>ΔHep</sup>  
618 adult male mice fasted overnight received an intravenous injection of 10% tyloxapol  
619 (500 mg/kg) (Sigma-Aldrich, T8761, Saint Louis, MO, USA). Blood was collected from the tail  
620 vein at 0, 1, 2, 3 and 4 hours for triglyceride assays.

621

### 622 **Glucose/Insulin/pyruvate tolerance test**

623 -Glucose (GTT), Insulin (ITT) and pyruvate (PTT) tolerance tests were performed under chow  
624 diet or after 12 weeks of HFD after an overnight fast. Glucose (Sigma, G8270, Saint Louis,



625 MO, USA) was orally administered at 1.5 g/kg dose, Insulin was injected i.p at 0.75 U/kg and  
626 pyruvate (Sigma, P2256, Saint Louis, MO, USA) was administrated by i.p. injection at 1.5g/kg.  
627 For all tolerance tests the glycaemia evolution was then monitored at the tail vein using Accu-  
628 Check glucometer (Roche). Plasma insulin (Mercodia, Upasal, Sweden) was determined by  
629 ELISA in the fasted state or at indicated times.

630

### 631 **Primary Hepatocyte Isolation**

632 Mouse hepatocytes were isolated as previously described via 2-step collagenase perfusion as  
633 described by Fortier *et al* (44). Hepatocytes were allowed to attach for 90 minutes on collagen-  
634 coated plates in RPMI containing 10% FBS (Gibco), followed by overnight starvation in serum-  
635 free medium before experiments (Lipogenesis and  $\beta$ -oxidation assay).

636

### 637 **Lipogenesis assays**

638 -For *in vitro* measurement, one day after isolation, primary hepatocytes were serum-starved for  
639 3 hours and incubated for 3-hour with [1- $^{14}$ C] acetate (1  $\mu$ Ci/ml; Perkin Elmer, Boston, MA)  
640 and 5.5 mM of non-labeled (cold) glucose in DMEM medium. At the end of incubation, cells  
641 were washed twice with cold PBS 1X and harvested into 0.25 ml of 0.1% SDS for subsequent  
642 protein measurement and total lipid extraction with 1 ml of chloroform/methanol (2v/1v). Lipid  
643 extracts were washed with 70% ethanol, and then dissolved into chloroform/methanol (2v/1v).  
644 Radioactivity was measured on a multipurpose scintillation counter (LS 6500; Beckman  
645 Coulter). All assays were performed in duplicates, and data normalized to cell protein content.

646 -For *in vivo* measurement of lipogenesis activity, animals were fasted for 6 hours at ZT14 and  
647 received an i.p. bolus of 2 mg/g glucose containing 0.4 $\mu$ Ci/g of [3- $^3$ H]-D-glucose (Perkin-  
648 Elmer, NET331C, Waltham, MA, USA). After 1 hour, liver, epididymal, subcutaneous and  
649 brown adipose tissues were collected and snap-frozen in liquid nitrogen.

650 - For palmitate oxidation assay: Cells were preincubated for 3 hours with  $^{14}$ Cpalmitate  
651 (1 $\mu$ Ci/mL; Perkin Elmer, Boston MA) and non labeled (cold) palmitate. Palmitate was coupled  
652 to a fatty acid-free BSA in a molar ratio of 5:1. Following incubation,  $^{14}$ CO $_2$  and  $^{14}$ C-ASM were  
653 measured as previously described (45). Briefly, assayed medium was transferred into a custom-  
654 made Teflon 48-well trapping plate. The plate was clamped and sealed, and perchloric acid was  
655 injected through the perforations in the lid into the medium, which drives CO $_2$  through the  
656 tunnel into an adjacent well, where it was trapped in 1N NaOH. Following trapping, the media  
657 was spun twice and  $^{14}$ C-ASM measured by scintillation counting. Aliquots of NaOH and  
658 medium were transferred into scintillation vials, and radioactivity was measured on a

659 multipurpose scintillation counter (LS 6500; Beckham Coulter). All assays were performed in  
660 triplicates, and data were normalized to protein content.

661

### 662 **Liver neutral lipid analysis**

663 Hepatic lipids were extracted by the “Folch” procedure before being quantified using mass  
664 spectrometry. Briefly, 50mg of liver were homogenized in 1mL water:methanol (1:2 v/v), 5  
665 mM EGTA. Lipids are then extracted using a methanol: chloroform: water (2.5:2.5 : 1.7 v/v)  
666 mix. After a solid phase extraction, purification and desiccation, all lipids are eluted in ethyl-  
667 acetate and analyzed by a gas chromatography combined with mass spectrometry (GC-MS)  
668 (ISQ Thermo).

669

### 670 **Microarray Gene Expression Studies**

671 Gene expression profiles were performed at the GeT-TRiX facility (GénoToul, Génopole  
672 Toulouse Midi-Pyrénées) using Agilent Sureprint G3 Mouse GE v2 microarrays (8x60K, design  
673 074809) following the manufacturer's instructions. For each sample, Cyanine-3 (Cy3) labeled  
674 cRNA was prepared from 200 ng of total RNA using the One-Color Quick Amp Labeling kit  
675 (Agilent) according to the manufacturer's instructions, followed by Agencourt RNAClean XP  
676 (Agencourt Bioscience Corporation, Beverly, Massachusetts). Dye incorporation and cRNA  
677 yield were checked using Dropsense™ 96 UV/VIS droplet reader (Trinean, Belgium). 600 ng of  
678 Cy3-labelled cRNA were hybridized on the microarray slides following the manufacturer's  
679 instructions. Immediately after washing, the slides were scanned on Agilent G2505C  
680 Microarray Scanner using Agilent Scan Control A.8.5.1 software and fluorescence signal  
681 extracted using Agilent Feature Extraction software v10.10.1.1 with default parameters.

682

### 683 **Microarray data statistical analysis:**

684 Microarray data were analyzed using R (46) and Bioconductor packages (47). Raw data  
685 (median signal intensity) were filtered, log<sub>2</sub> transformed and normalized using the quantile  
686 method (48) with the limma package (49).

687 A model was fit using the limma lmFit function (49). Pairwise comparisons between biological  
688 conditions were applied using specific contrasts. In cases where Agilent has multiple probe  
689 sequences for the same gene, the probe with the best p-value was selected. Probes with a p-  
690 value  $\leq 0.01$  were considered to be differentially expressed between conditions.

691 Normalized log intensities were averaged ( $n = 4$ ) within each group and heatmaps were  
692 generated with the ComplexHeatmap package (50). Venn diagrams were generated with the

693 Vennerable package (<https://github.com/js229/Vennerable>). Functional pathway enrichment  
694 was performed in R using the hypergea package's hypergeometric test ([https://cran.r-  
695 project.org/package=hypergea](https://cran.r-project.org/package=hypergea)). GO annotations were obtained using biomaRt (51) and the  
696 graphite package (52) was used to obtain pathways from the Reactome database. ChEA  
697 (<https://doi.org/10.1093/bioinformatics/btq466>) was interrogated via the Enrichr website (53) and  
698 tabular results were imported into R. Barcharts were constructed using ggplot2 (54). The  
699 network of pathways largely shared between F/R and HFD was constructed in R as csv files that  
700 were imported into Cytoscape (55).

701

### 702 **ChIP-seq**

703 Briefly, frozen liver biopsies (100-200 mg) harvested from HMGB1<sup>fl/fl</sup> and HMGB1<sup>ΔHep</sup> mice  
704 under CD, upon HFD60% or after F/R, were minced and fixed at room temperature in PBS-1%  
705 formaldehyde (Sigma-Aldrich, 47608, Saint Louis, MO, USA) for 20 minutes. After sonication,  
706 chromatin immunoprecipitation was performed using anti-HMGB1 antibody (Abcam, ab18256,  
707 Cambridge, UK). Immunoprecipitated DNA was subjected to library preparation and single-end  
708 sequencing on a NextSeq 500 at EMBL GeneCore (Heidelberg, Germany).

709

### 710 **ATAC-seq**

711 Flash-frozen liver biopsies were sent to Active Motif to perform the ATAC-seq assay. The  
712 tissue was manually dissociated, isolated nuclei were quantified using a hemocytometer, and  
713 100,000 nuclei were tagmented as previously described (56), with some modifications based on  
714 (57) using the enzyme and buffer provided in the Nextera Library Prep Kit (Illumina).  
715 Tagmented DNA was then purified using the MinElute PCR purification kit (Qiagen), amplified  
716 with 10 cycles of PCR, and purified using Agencourt AMPure SPRI beads (Beckman Coulter).  
717 Resulting material was quantified using the KAPA Library Quantification Kit for Illumina  
718 platforms (KAPA Biosystems), and sequenced with PE42 sequencing on the NextSeq 500  
719 sequencer (Illumina).

720

### 721 **ATAC-seq and ChIP-seq data analysis**

722 ATAC-seq and ChIP-seq reads were first mapped to the mouse genome UCSC build hmm10  
723 using Bowtie2 2.2.8 (58). Aligned reads were then filtered to keep only matched pairs and  
724 uniquely mapped reads. Peaks were called with MACS2 2.2.1 (59) algorithm using a mappable  
725 genome size of 2.73e<sup>9</sup>. To process ChIP-seq datasets, MACS2 was run with the “Delta”  
726 genotype as a negative control as in this condition the HMGB1 protein expression is reduced by

727 90 % and signal detected in “Delta” libraries, defined as background noise, was subtracted  
728 from the “Flox” libraries. ATAC-seq datasets were processed without a control file and with the  
729 –nomodel option. Called peaks that were on the ENCODE blacklist of known false ChIP-seq  
730 peaks were removed. Signal maps and peak locations were used as input to the statistical  
731 analysis performed with the R package ChIPseeker (60). DESeq2 (61) was used to identify  
732 differential binding sites and differential open chromatin profiles. Motifs and GO enrichment  
733 analysis were respectively performed using JASPAR (62) and the R package ReactomePA (63).

734

735 **Histology:** Tissue samples were fixed in 10% formalin (Sigma-Aldrich, HT501128, Saint  
736 Louis, MO, USA) for 24 hours, then incubated at 4°C in 70% ethanol before being paraffin-  
737 embedded or in 30% sucrose before being cryo-embedded with Tissue-Tek OCT (Sakura  
738 FineTek Europe, Alphen aan den Rijn, The Netherlands). Paraffin embedded livers were sliced  
739 at 5 µm. For Periodic Acid Schiff reaction, sections are incubated in 0.5% periodic acid in water  
740 for 5 minutes then transferred to Schiff reagent (Sigma-Aldrich, 3952016, Saint Louis, MO,  
741 USA) for 15 minutes. Sections were counterstained with Mayer’s hematoxylin (Sigma-Aldrich,  
742 MHS16, Saint Louis, MO, USA) before mounting. Liver-cryo sections were post-fixed with  
743 10% formalin 15 minutes prior staining with Oil-red-O (Sigma-Aldrich, MHS16, Saint Louis,  
744 MO, USA)(60% solution in isopropanol-Sigma-Aldrich, 33539, Saint Louis, MO, USA). After  
745 counter-staining with hematoxylin, slides are mounted with aqueous mounting media. Stained  
746 slides were scanned using a Nanozoomer scanner (Hamamatsu Photonics, Hamamatsu City,  
747 Japan). Images quantification was performed using Image J freeware (NIH, USA).

748

#### 749 **Western blotting**

750 Tissues were homogenized in RIPA buffer (TRIS 20 mM, NaCl 150 mM, EDTA 1 mM, EGTA  
751 1 mM, TRITON X100 1%, Tetra-Sodium Pyrophosphate 2.5 mM, B-Glycerophosphate 1 mM,  
752 Sodium orthovanadate 1 mM) containing protease and phosphatase inhibitors (Sigma-Aldrich,  
753 St. Louis, MO, USA) using Precellys sample lyzer (Bertin Technologies, Montigny le  
754 Bretonneux, France). Western blots were performed using standard procedures using antibodies  
755 against HMGB1 (1:1000, ab18256, Abcam, Cambridge, UK), Phospho-AKT S473 (1:1000,  
756 CST 4060, Cell Signaling Technology, Danvers, MA, USA), total AKT (1:1000, CST 9272,  
757 Cell Signaling Technology, Danvers, MA, USA), HA (1:1000, CST 3724 Cell Signaling  
758 Technology, Danvers, MA, USA), Myc-tag (1:1000, CST 2276, Cell Signaling Technology,  
759 Danvers, MA, USA) and GAPDH (1: 2000, ab181602, Abcam, Cambridge, UK), was used as a  
760 loading control.

## 761 **Reporter assay**

762 For reporter assay, Ad293 cells were cultured in 96 well plates with DMEM containing 10% FB  
763 Essence (Avantor Seradigm, USA) and transfected using Transit-LT1 (Mirus Bio, Madison, WI,  
764 USA) with plasmid encoding 4 LXR response elements fused with luciferase, human HA-LXR  
765 (HA-hLXR) and RXR. HMGB1 plasmid was purchased from Origene. 24h after transfection,  
766 cells media was changed to DMEM containing 2% charcoal striped and dialyzed media with 0.1  
767 uM of T0901317 and/or 1uM of LG100268 (noted LG268) (Cayman Chemical, USA). After  
768 overnight treatment, luciferase activity was assayed using a luciferase assay system (Promega,  
769 USA). Bioluminescence was quantified using a luminometer and normalized to  $\beta$ -Gal activity.

770

## 771 **Co-immunoprecipitation**

772 Ad293 cells were plated in 6 well-plate and transfected as previously described with 1 ug of  
773 HA-hLXR and/or HMGB1 plasmids. 24h after transfection, cells were treated with 0.1uM of  
774 T0901317 overnight. Cells were lysed in IP buffer (20mM Tris-HCl pH8, 100mM NaCl,  
775 0.1%NP40, 10% glycerol, 2uM PMSF and 1mM DTT) supplemented with antiprotease and  
776 antiphosphatase cocktails.

777 IP was performed using HA-conjugated beads (Sigma) for 2h at 4°C, following wash step,  
778 beads were resuspended in 2X Laemmli buffer and western blot was performed as previously  
779 described.

780

## 781 **Gene expression**

782 RNA were extracted using GenJET RNA purification kit (ThermoScientific, Waltham, MA,  
783 USA) and DNase treatment (Qiagen, Hilden, Germany). After dosage with Xpose (Trinean,  
784 Gentbrugge, Belgium) reverse transcription was performed using High Capacity cDNA reverse  
785 transcription kit (Applied Biosystem, Foster City, CA, USA) according to the manufacturer  
786 protocol. Real-Time -qPCR was performed with indicated primer pairs gene expression is  
787 normalized using *36b4* reference gene expression. Primer sequences are available in **Table S3**.

788

## 789 **Microfluidic qPCR**

790 Expression analyses of lipogenesis related-genes (**Table S3**) were performed by quantitative  
791 PCR with Fluidigm Biomark<sup>®</sup> technology (Genome & Transcriptome GenoToul Platform).  
792 First-strand cDNA templates were pre-amplified with Preamp Master Mix (Fluidigm) and  
793 reactions were achieved in a Fluidigm Biomark<sup>®</sup> BMK-M-96.96 plate according to the  
794 manufacturer's recommendations. Relative gene expression values were determined using the

795  $2^{-\Delta\Delta CT}$  method. The expression analyses data are an average of seven individuals for HMGB1<sup>fl/fl</sup>  
796 mice and 10 individuals for HMGB1<sup>ΔHep</sup> mice. As described before, the *36B4* gene expression  
797 levels were used for data standardization.

798

## 799 Plasma analysis

800 Whole blood is drawn out from the inferior vena cava after euthansia, and plasma is prepared  
801 after centrifugation (5 minutes; 4 °C; 8000 rpm). Circulating AST (ASpartate  
802 aminoTransferase) and ALT (ALanine aminoTransferase) levels were determined in plasma by  
803 the Phénotypage-CREFRE facility using a Pentra400 biochemical analyzer (HORIBA Medical,  
804 Kyoto, Japan). HMGB1 circulating levels were assessed by ELISA (ST51011, IBL  
805 International, Hamburg, Germany) on 10 uL of plasma, according to the manufacturer  
806 guidelines.

807

## 808 Statistics

809 Analyses are performed using GraphPad Prism 7 (GraphPad Software, La Jolla, CA, USA).  
810 Potential outliers were identified using ROUT algorithm (GraphPad Software) and removed  
811 from analysis. All data are expressed as mean ± SEM, except otherwise indicated. Statistical  
812 significance was determined by Mann & Withney, one-way ANOVA or two-way ANOVA  
813 followed by a Tuckey post-hoc test. P values <0.05 were considered significant (\*p < 0.05; \*\*p  
814 < 0.01; \*\*\*p < 0.001; \*\*\*\*p < 0.0001).

815

## 816 H2: Supplementary Materials

817

818 Fig. S1. Metabolic explorations of Hepatocyte specific *Hmgb1* deleted mice subjected to chow-  
819 diet.

820 Fig. S2. Metabolic explorations of Hepatocyte specific *Hmgb1* deleted mice subjected to high-  
821 fat diet.

822 Fig. S3. Hepatocyte specific *Hmgb1* deleted mice exhibit a severe liver steatosis upon various  
823 diets.

824 Fig. S4. Hierarchical clustering and color heatmap of differentially expressed gene comparing  
825 livers of HMGB1<sup>fl/fl</sup> and HMGB1<sup>ΔHep</sup> mice.

826 Fig. S5. Hepatocyte specific *Pparγ* deletion does not modify liver steatosis in mice after F/R  
827 challenge.

828 Fig. S6. Hepatocyte specific *Hmgb1* deleted mice exhibit a severe liver steatosis under  
829 metabolic stressors that is restored by knocking-down LXRα *in vivo*.

830 Fig. S7. Hepatocyte specific *Hmgb1* deletion does not remodel chromatin.

831 Fig. S8. Validation of HMGB1 CHIP *in vitro* and *in vivo*.

832 Fig. S9. Genomic and around TSS (-1kb/+1kb) region distribution of HMGB1.

833 Fig. S10. Successful *in vivo* knockdown of *Hmgb1* gene and protein using AAV-TBG-Cre.



834

835 **Table S1. List of genes highly occupied by HMGB1 in Chow Diet compare to HFD**

836 **Table S2. List of genes highly occupied by HMGB1 in Chow Diet compare to F/R**

837 **Table S3. Primers for Real time qPCR**

838

839 **References and Notes**

840

- 841 1. Z. Younossi, Q. M. Anstee, M. Marietti, T. Hardy, L. Henry, M. Eslam, J. George, E.  
842 Bugianesi, Global burden of NAFLD and NASH: Trends, predictions, risk factors and  
843 prevention. *Nat. Rev. Gastroenterol. Hepatol.* **15** (2018), pp. 11–20.
- 844 2. Q. M. Anstee, H. L. Reeves, E. Kotsiliti, O. Govaere, M. Heikenwalder, From NASH to  
845 HCC: current concepts and future challenges. *Nat. Rev. Gastroenterol. Hepatol.* **16**  
846 (2019), pp. 411–428.
- 847 3. Y. Wang, J. Viscarra, S.-J. Kim, H. S. Sul, Transcriptional regulation of hepatic  
848 lipogenesis. *Nat. Rev. Mol. Cell Biol.* **16**, 678–89 (2015).
- 849 4. B. Wang, P. Tontonoz, Liver X receptors in lipid signalling and membrane homeostasis.  
850 *Nat. Rev. Endocrinol.* **14** (2018), pp. 452–463.
- 851 5. S. Ducheix, A. Montagner, A. Polizzi, F. Lasserre, A. Marmugi, J. Bertrand-Michel, N.  
852 Podechard, T. Al Saati, M. Chétiveaux, S. Baron, J. Boué, G. Dietrich, L. Mselli-Lakhal,  
853 P. Costet, J. M. A. Lobaccaro, T. Pineau, V. Theodorou, C. Postic, P. G. P. Martin, H.  
854 Guillou, Essential fatty acids deficiency promotes lipogenic gene expression and hepatic  
855 steatosis through the liver X receptor. *J. Hepatol.* **58**, 984–992 (2013).
- 856 6. D. J. Peet, S. D. Turley, W. Ma, B. A. Janowski, J. M. A. Lobaccaro, R. E. Hammer, D.  
857 J. Mangelsdorf, Cholesterol and bile acid metabolism are impaired in mice lacking the  
858 nuclear oxysterol receptor LXR $\alpha$ . *Cell.* **93**, 693–704 (1998).
- 859 7. S. Ducheix, A. Montagner, A. Polizzi, F. Lasserre, M. Régnier, A. Marmugi, F.  
860 Benhamed, J. Bertrand-Michel, L. Mselli-Lakhal, N. Loiseau, P. G. Martin, J.-M.  
861 Lobaccaro, L. Ferrier, C. Postic, H. Guillou, Dietary oleic acid regulates hepatic  
862 lipogenesis through a liver X receptor-dependent signaling. *PLoS One.* **12**, e0181393  
863 (2017).
- 864 8. Y. Wang, J. Viscarra, S. J. Kim, H. S. Sul, Transcriptional regulation of hepatic  
865 lipogenesis. *Nat. Rev. Mol. Cell Biol.* **16** (2015), pp. 678–689.
- 866 9. J. Viscarra, H. S. Sul, Epigenetic regulation of hepatic lipogenesis: Role in  
867 hepatosteatosis and diabetes. *Diabetes.* **69**, 525–531 (2020).
- 868 10. J. H. Kim, D. Y. Jung, H. R. Kim, M. H. Jung, Histone h3k9 demethylase jmjd2b plays a  
869 role in lxr $\alpha$ -dependent lipogenesis. *Int. J. Mol. Sci.* **21**, 1–17 (2020).
- 870 11. S. W. Beaven, A. Matveyenko, K. Wroblewski, L. Chao, D. Wilpitz, T. W. Hsu, J. Lentz,  
871 B. Drew, A. L. Hevener, P. Tontonoz, Reciprocal regulation of hepatic and adipose  
872 lipogenesis by liver X receptors in obesity and insulin resistance. *Cell Metab.* **18**, 106–  
873 117 (2013).
- 874 12. N. Y. Kalaany, K. C. Gauthier, A. M. Zavacki, P. P. A. Mammen, T. Kitazume, J. A.  
875 Peterson, J. D. Horton, D. J. Garry, A. C. Bianco, D. J. Mangelsdorf, LXRs regulate the  
876 balance between fat storage and oxidation. *Cell Metab.* **1**, 231–244 (2005).
- 877 13. J. J. Repa, G. Liang, J. Ou, Y. Bashmakov, J. M. A. Lobaccaro, I. Shimomura, B. Shan,  
878 M. S. Brown, J. L. Goldstein, D. J. Mangelsdorf, Regulation of mouse sterol regulatory  
879 element-binding protein-1c gene (SREBP-1c) by oxysterol receptors, LXR $\alpha$  and LXR $\beta$ .  
880 *Genes Dev.* **14**, 2819–2830 (2000).
- 881 14. B. L. Heckmann, X. Zhang, A. M. Saarinen, G. Schoiswohl, E. E. Kershaw, R. Zechner,



- 882 J. Liu, Liver X receptor  $\alpha$  mediates hepatic triglyceride accumulation through  
883 upregulation of G0/G1 Switch Gene 2 expression. *JCI Insight*. **2** (2017),  
884 doi:10.1172/jci.insight.88735.
- 885 15. T. G. Kirchgessner, P. Sleph, J. Ostrowski, J. Lupisella, C. S. Ryan, X. Liu, G. Fernando,  
886 D. Grimm, P. Shipkova, R. Zhang, R. Garcia, J. Zhu, A. He, H. Malone, R. Martin, K.  
887 Behnia, Z. Wang, Y. C. Barrett, R. J. Garmise, L. Yuan, J. Zhang, M. D. Gandhi, P.  
888 Wastall, T. Li, S. Du, L. Salvador, R. Mohan, G. H. Cantor, E. Kick, J. Lee, R. J. A.  
889 Frost, Beneficial and Adverse Effects of an LXR Agonist on Human Lipid and  
890 Lipoprotein Metabolism and Circulating Neutrophils. *Cell Metab*. **24**, 223–233 (2016).
- 891 16. H. Yang, H. Wang, U. Andersson, Targeting Inflammation Driven by HMGB1. *Front*.  
892 *Immunol*. **11** (2020), , doi:10.3389/fimmu.2020.00484.
- 893 17. G. H. Goodwin, C. Sanders, E. W. Johns, A New Group of Chromatin-Associated  
894 Proteins with a High Content of Acidic and Basic Amino Acids. *Eur. J. Biochem*. **38**, 14–  
895 19 (1973).
- 896 18. I. PJ, F. JL, B. DL, R. GR, Preferential affinity of high molecular weight high mobility  
897 group non-histone chromatin proteins for single-stranded DNA. *J. Biol. Chem*. **254**  
898 (1979).
- 899 19. M. Štros, HMGB proteins: Interactions with DNA and chromatin. *Biochim. Biophys.*  
900 *Acta - Gene Regul. Mech*. **1799** (2010), pp. 101–113.
- 901 20. H. Ito, K. Fujita, K. Tagawa, X. Chen, H. Homma, T. Sasabe, J. Shimizu, S. Shimizu, T.  
902 Tamura, S. Muramatsu, H. Okazawa, HMGB 1 facilitates repair of mitochondrial DNA  
903 damage and extends the lifespan of mutant ataxin-1 knock-in mice . *EMBO Mol. Med*. **7**,  
904 78–101 (2015).
- 905 21. M. Watson, K. Stott, H. Fischl, L. Cato, J. O. Thomas, Characterization of the interaction  
906 between HMGB1 and H3-a possible means of positioning HMGB1 in chromatin,  
907 doi:10.1093/nar/gkt950.
- 908 22. B. Celona, A. Weiner, F. Di Felice, F. M. Mancuso, E. Cesarini, R. L. Rossi, L. Gregory,  
909 D. Baban, G. Rossetti, P. Grianti, M. Pagani, T. Bonaldi, J. Ragoussis, N. Friedman, G.  
910 Camilloni, M. E. Bianchi, A. Agresti, Substantial Histone reduction modulates  
911 Genomewide nucleosomal occupancy and global transcriptional output. *PLoS Biol*. **9**  
912 (2011), doi:10.1371/journal.pbio.1001086.
- 913 23. T. Imamura, H. Izumi, G. Nagatani, T. Ise, M. Nomoto, Y. Iwamoto, K. Kohno,  
914 Interaction with p53 Enhances Binding of Cisplatin-modified DNA by High Mobility  
915 Group 1 Protein. *J. Biol. Chem*. **276**, 7534–7540 (2001).
- 916 24. Y. Najima, N. Yahagi, Y. Takeuchi, T. Matsuzaka, M. Sekiya, Y. Nakagawa, M.  
917 Amemiya-Kudo, H. Okazaki, S. Okazaki, Y. Tamura, Y. Iizuka, K. Ohashi, K. Harada,  
918 T. Gotoda, R. Nagai, T. Kadowaki, S. Ishibashi, N. Yamada, J. I. Osuga, H. Shimano,  
919 High mobility group protein-B1 interacts with sterol regulatory element-binding proteins  
920 to enhance their DNA binding. *J. Biol. Chem*. **280**, 27523–27532 (2005).
- 921 25. A. Agresti, P. Scaffidi, A. Riva, V. R. Caiolfa, M. E. Bianchi, GR and HMGB1 interact  
922 only within chromatin and influence each other's residence time. *Mol. Cell*. **18**, 109–121  
923 (2005).
- 924 26. S. Sofiadis, K. K., N. Nikolic, M. M., Z. Zirkel, A. A., K. Kargapolova, Y. Y., J.  
925 Josipovic, N. N., P. Papadakis, A. A., G. Gusmao, E. E., M. Mizi, A. A., G.  
926 Georgomanolis, T. T., K. Koker, M. M., U. Ullrich, R. R., A. Altmueller, J. J., N.  
927 Nuernberg, P. P., B. Beyer, A. A., P. Papantonis, A. A., HMGB1 as a rheostat of  
928 chromatin topology and RNA homeostasis on the path to senescence. *bioRxiv Genomics*,  
929 1–33 (2019).
- 930 27. N. Senda, H. Yanai, S. Hibino, L. Li, Y. Mizushima, T. Miyagaki, M. Saeki, Y. Kishi, S.  
931 Hangai, J. Nishio, M. Sugaya, T. Taniguchi, S. Sato, HMGB1-mediated chromatin

- remodeling attenuates Il24 gene expression for the protection from allergic contact dermatitis. *Proc. Natl. Acad. Sci. U. S. A.* **118** (2020), doi:10.1073/pnas.2022343118.
28. S. Calogero, F. Grassi, A. Aguzzi, T. Voigtländer, P. Ferrier, S. Ferrari, M. E. Bianchi, The lack of chromosomal protein Hmg1 does not disrupt cell growth but causes lethal hypoglycaemia in newborn mice. *Nat. Genet.* **22**, 276–80 (1999).
29. P. Huebener, G.-Y. Gwak, J.-P. Pradere, C. M. Quinzii, R. Friedman, C.-S. Lin, C. M. Trent, I. Mederacke, E. Zhao, D. H. Dapito, Y. Lin, I. J. Goldberg, M. J. Czaja, R. F. Schwabe, High-mobility group box 1 is dispensable for autophagy, mitochondrial quality control, and organ function in vivo. *Cell Metab.* **19**, 539–47 (2014).
30. T. Jelenik, K. Kaul, G. Séquaris, U. Flögel, E. Phielix, J. Kotzka, B. Knebel, P. Fahlbusch, T. Hörbelt, S. Lehr, A. L. Reinbeck, D. Müller-Wieland, I. Esposito, G. I. Shulman, J. Szendroedi, M. Roden, Mechanisms of insulin resistance in primary and secondary nonalcoholic fatty liver. *Diabetes.* **66**, 2241–2253 (2017).
31. M. H. Oosterveer, T. H. Van Dijk, A. Grefhorst, V. W. Bloks, R. Havinga, F. Kuipers, D. J. Reijngoud, Lxr $\alpha$  deficiency hampers the hepatic adaptive response to fasting in mice. *J. Biol. Chem.* **283**, 25437–25445 (2008).
32. Y. Zhang, S. R. Breevoort, J. Angdisen, M. Fu, D. R. Schmidt, S. R. Holmstrom, S. A. Kliewer, D. J. Mangelsdorf, I. G. Schulman, Liver LXR $\alpha$  expression is crucial for whole body cholesterol homeostasis and reverse cholesterol transport in mice. *J. Clin. Invest.* **122**, 1688–1699 (2012).
33. K. Matsusue, M. Haluzik, G. Lambert, S.-H. Yim, O. Gavrilova, J. M. Ward, B. Brewer, M. L. Reitman, F. J. Gonzalez, Liver-specific disruption of PPAR $\gamma$  in leptin-deficient mice improves fatty liver but aggravates diabetic phenotypes. *J. Clin. Invest.* **111**, 737–747 (2003).
34. E. Morán-Salvador, M. López-Parra, V. García-Alonso, E. Titos, M. Martínez-Clemente, A. González-Pérez, C. López-Vicario, Y. Barak, V. Arroyo, J. Clària, Role for PPAR $\gamma$  in obesity-induced hepatic steatosis as determined by hepatocyte- and macrophage-specific conditional knockouts. *FASEB J.* **25**, 2538–2550 (2011).
35. A. B. Engin, in *Advances in Experimental Medicine and Biology* (Springer New York LLC, 2017), vol. 960, pp. 197–220.
36. J. Zhang, L. Zhang, S. Zhang, Q. Yu, F. Xiong, K. Huang, C. Y. Wang, P. Yang, HMGB1, an innate alarmin, plays a critical role in chronic inflammation of adipose tissue in obesity. *Mol. Cell. Endocrinol.* **454** (2017), pp. 103–111.
37. D. Bertheloot, E. Latz, HMGB1, IL-1 $\alpha$ , IL-33 and S100 proteins: Dual-function alarmins. *Cell. Mol. Immunol.* **14** (2017), pp. 43–64.
38. T. Shimizu, M. Yamakuchi, K. K. Biswas, B. Aryal, S. Yamada, T. Hashiguchi, I. Maruyama, HMGB1 is secreted by 3T3-L1 adipocytes through JNK signaling and the secretion is partially inhibited by adiponectin. *Obesity.* **24**, 1913–1921 (2016).
39. M. K. Gunasekaran, W. Viranaicken, A.-C. Girard, F. Festy, M. Cesari, R. Roche, L. Hoareau, Inflammation triggers high mobility group box 1 (HMGB1) secretion in adipose tissue, a potential link to obesity. *Cytokine.* **64**, 103–11 (2013).
40. L. Jia, H. Song, W. Fan, Y. Song, G. Wang, X. Li, Y. He, A. Yao, The association between high mobility group box 1 chromatin protein and mitotic chromosomes in glioma cells. *Oncol. Lett.* **19**, 745–752 (2020).
41. T. T. Schug, X. Li, Sirtuin 1 in lipid metabolism and obesity. *Ann. Med.* **43**, 198–211 (2011).
42. S. Xu, Z. Zeng, M. Zhao, Q. Huang, Y. Gao, X. Dai, J. Lu, W. Huang, K. Zhao, Evidence for SIRT1 Mediated HMGB1 Release From Kidney Cells in the Early Stages of Hemorrhagic Shock. *Front. Physiol.* **10**, 854 (2019).
43. S. Ghaffari, E. Jang, F. N. Nabi, R. Sanwal, N. Khosraviani, C. Wang, B. E. Steinberg,

982 N. M. Goldenberg, J. Ikeda, W. L. Lee, Endothelial HMGB1 Is a Critical Regulator of  
983 LDL Transcytosis via an SREBP2–SR-BI Axis. *Arterioscler. Thromb. Vasc. Biol.*  
984 (2020), doi:10.1161/atvbaha.120.314557.

985 44. M. Fortier, S. Celton-Morizur, C. Desdouets, Incomplete cytokinesis/binucleation in  
986 mammals: The powerful system of hepatocytes. *Methods Cell Biol.* **137**, 119–142 (2017).

987 45. C. Laurens, V. Bourlier, A. Mairal, K. Louche, P. M. Badin, E. Mouisel, A. Montagner,  
988 A. Marette, A. Tremblay, J. S. Weisnagel, H. Guillou, D. Langin, D. R. Joannisse, C.  
989 Moro, Perilipin 5 fine-tunes lipid oxidation to metabolic demand and protects against  
990 lipotoxicity in skeletal muscle. *Sci. Rep.* **6** (2016), doi:10.1038/srep38310.

991 46. R: The R Project for Statistical Computing, (available at <https://www.r-project.org/>).

992 47. W. Huber, V. J. Carey, R. Gentleman, S. Anders, M. Carlson, B. S. Carvalho, H. C.  
993 Bravo, S. Davis, L. Gatto, T. Girke, R. Gottardo, F. Hahne, K. D. Hansen, R. A. Irizarry,  
994 M. Lawrence, M. I. Love, J. MacDonald, V. Obenchain, A. K. Oleš, H. Pagès, A. Reyes,  
995 P. Shannon, G. K. Smyth, D. Tenenbaum, L. Waldron, M. Morgan, Orchestrating high-  
996 throughput genomic analysis with Bioconductor. *Nat. Methods.* **12**, 115–121 (2015).

997 48. B. M. Bolstad, R. A. Irizarry, M. Åstrand, T. P. Speed, A comparison of normalization  
998 methods for high density oligonucleotide array data based on variance and bias.  
999 *Bioinformatics.* **19**, 185–193 (2003).

1000 49. M. E. Ritchie, B. Phipson, D. Wu, Y. Hu, C. W. Law, W. Shi, G. K. Smyth, Limma  
1001 powers differential expression analyses for RNA-sequencing and microarray studies.  
1002 *Nucleic Acids Res.* **43**, e47 (2015).

1003 50. Z. Gu, R. Eils, M. Schlesner, Complex heatmaps reveal patterns and correlations in  
1004 multidimensional genomic data. *Bioinformatics.* **32**, 2847–2849 (2016).

1005 51. S. Durinck, P. T. Spellman, E. Birney, W. Huber, Mapping identifiers for the integration  
1006 of genomic datasets with the R/ Bioconductor package biomaRt. *Nat. Protoc.* **4**, 1184–  
1007 1191 (2009).

1008 52. G. Sales, E. Calura, D. Cavalieri, C. Romualdi, Graphite - a Bioconductor package to  
1009 convert pathway topology to gene network. *BMC Bioinformatics.* **13**, 1–12 (2012).

1010 53. M. V. Kuleshov, M. R. Jones, A. D. Rouillard, N. F. Fernandez, Q. Duan, Z. Wang, S.  
1011 Koplev, S. L. Jenkins, K. M. Jagodnik, A. Lachmann, M. G. McDermott, C. D. Monteiro,  
1012 G. W. Gundersen, A. Ma'ayan, Enrichr: a comprehensive gene set enrichment analysis  
1013 web server 2016 update. *Nucleic Acids Res.* **44**, W90–W97 (2016).

1014 54. H. Wickham, *ggplot2* (Springer New York, 2009).

1015 55. P. Shannon, A. Markiel, O. Ozier, N. S. Baliga, J. T. Wang, D. Ramage, N. Amin, B.  
1016 Schwikowski, T. Ideker, Cytoscape: A software Environment for integrated models of  
1017 biomolecular interaction networks. *Genome Res.* **13**, 2498–2504 (2003).

1018 56. J. D. Buenrostro, P. G. Giresi, L. C. Zaba, H. Y. Chang, W. J. Greenleaf, Transposition  
1019 of native chromatin for fast and sensitive epigenomic profiling of open chromatin, DNA-  
1020 binding proteins and nucleosome position. *Nat. Methods.* **10**, 1213–1218 (2013).

1021 57. M. R. Corces, A. E. Trevino, E. G. Hamilton, P. G. Greenside, N. A. Sinnott-Armstrong,  
1022 S. Vesuna, A. T. Satpathy, A. J. Rubin, K. S. Montine, B. Wu, A. Kathiria, S. W. Cho,  
1023 M. R. Mumbach, A. C. Carter, M. Kasowski, L. A. Orloff, V. I. Risca, A. Kundaje, P. A.  
1024 Khavari, T. J. Montine, W. J. Greenleaf, H. Y. Chang, An improved ATAC-seq protocol  
1025 reduces background and enables interrogation of frozen tissues. *Nat. Methods.* **14**, 959–  
1026 962 (2017).

1027 58. B. Langmead, S. L. Salzberg, Fast gapped-read alignment with Bowtie 2. *Nat. Methods.*  
1028 **9**, 357–359 (2012).

1029 59. Y. Zhang, T. Liu, C. A. Meyer, J. Eeckhoute, D. S. Johnson, B. E. Bernstein, C.  
1030 Nussbaum, R. M. Myers, M. Brown, W. Li, X. S. Shirley, Model-based analysis of ChIP-  
1031 Seq (MACS). *Genome Biol.* **9**, R137 (2008).

- 1032 60. G. Yu, L. G. Wang, Q. Y. He, ChIP seeker: An R/Bioconductor package for ChIP peak  
1033 annotation, comparison and visualization. *Bioinformatics*. **31**, 2382–2383 (2015).  
1034 61. M. I. Love, W. Huber, S. Anders, Moderated estimation of fold change and dispersion for  
1035 RNA-seq data with DESeq2. *Genome Biol.* **15**, 550 (2014).  
1036 62. O. Fornes, J. A. Castro-Mondragon, A. Khan, R. Van Der Lee, X. Zhang, P. A.  
1037 Richmond, B. P. Modi, S. Correard, M. Gheorghe, D. Baranašić, W. Santana-Garcia, G.  
1038 Tan, J. Chèneby, B. Ballester, F. Parcy, A. Sandelin, B. Lenhard, W. W. Wasserman, A.  
1039 Mathelier, JASPAR 2020: Update of the open-Access database of transcription factor  
1040 binding profiles. *Nucleic Acids Res.* **48**, D87–D92 (2020).  
1041 63. G. Yu, Q. Y. He, ReactomePA: An R/Bioconductor package for reactome pathway  
1042 analysis and visualization. *Mol. Biosyst.* **12**, 477–479 (2016).  
1043  
1044

## 1045 **Acknowledgments**

1046  
1047 The authors would like to thank the phenotyping facility (Anexplo-US006/CREFRE, Toulouse,  
1048 France) for all plasma analysis and technical assistance. We also thank the Histology (Lucie  
1049 Fontaine) and the Functional Biochemistry (Alexandre Lucas) Facilities at the i2MC for  
1050 technical assistance (UMR1048-Toulouse, France). We thank Claire Naylies and Yannick Lippi  
1051 for their contribution to microarray fingerprints acquisition and microarray data analysis carried  
1052 out at GeT Genopole Toulouse Midi-Pyrénées facility  
1053 (<https://doi.org/10.15454/1.5572370921303193E12>). Jean-José Maoret (GeT-Santé, UMR1048-  
1054 Toulouse, France) for his technical help during the microfluidic PCR experiments, Justine  
1055 Bertrand-Michel and the lipidomic facility (Genotoul-MetaToul Lipidomique, UMR1048-  
1056 Toulouse, France) for all lipid analysis and technical assistance. We kindly thank Dr. Pierre-  
1057 Damien Denechaud (i2MC-INSERM-Toulouse) for fruitful discussions and kind advices.  
1058

## 1059 **Funding:**

1060 This study is supported by grants from INSERM, Paul Sabatier University, the Agence  
1061 Nationale de la Recherche (ANR-17-CE14-0016, J-PP) and Association Française d'Etude et de  
1062 Recherche sur l'Obésité (J-PP). JP is supported by a scholarship from Paul Sabatier University,  
1063 EP is supported by a scholarship from Agence Nationale de la Recherche (ANR-17-CE14-  
1064 0016) and RP is supported by a scholarship from Région Midi-Pyrénées-INSERM  
1065 (n°15050341).  
1066

## 1067 **Author contributions**

1068 JP designed research, performed all experiments, analyzed data and wrote the manuscript; AD,  
1069 AP, AB, SD, EP, RP and EM performed experiments and analyzed data, J.SI and JM analyzed  
1070 high-throughput data and draft related figures. TC and GL carried out the ChIP-seq

1071 experiments, analyzed data and reviewed the manuscript. AM and W.AW generously provided  
1072 PPAR $\gamma^{fl/fl}$  and PPAR $\gamma^{\Delta Hep}$  mice. W.AW reviewed and commented on the manuscript. R.FS  
1073 kindly provided HMGB1 floxed mice and reviewed the manuscript. AY and IC-L have  
1074 provided valuable inputs, daily support, have reviewed and edited the manuscript. CP and FB  
1075 kindly provided the adenovirus expressing shRNA-targeting LXR, reviewed and commented on  
1076 the manuscript; CM performed lipogenesis and Beta-Ox assays *in vitro* and *in vivo*, analyzed  
1077 data and reviewed and commented on the manuscript; HG designed and performed experiments,  
1078 analyzed data provided reagents, gave important input related to the study design, reviewed and  
1079 commented on the manuscript, PV and CD have provided daily support, fruitful discussions,  
1080 fundings and revised and commented on the manuscript; J-PP conceived the original  
1081 hypothesis, designed all experiments, performed experiments, analyzed data, wrote the  
1082 manuscript, provided fundings and supervised the project.

1083

#### 1084 **Competing interests:**

1085 The authors declare no conflicts of interest.

1086

1087 **Data and materials availability:** All data needed to evaluate the conclusions in the paper are  
1088 present in the paper and/or the Supplementary Materials.

1089

1090

1091

1092

1093

1094

1095

1096

1097

1098

1099

1100

1101

1102

1103

1104

1105

1106

1107

1108

1109

1110



1111  
1112  
1113

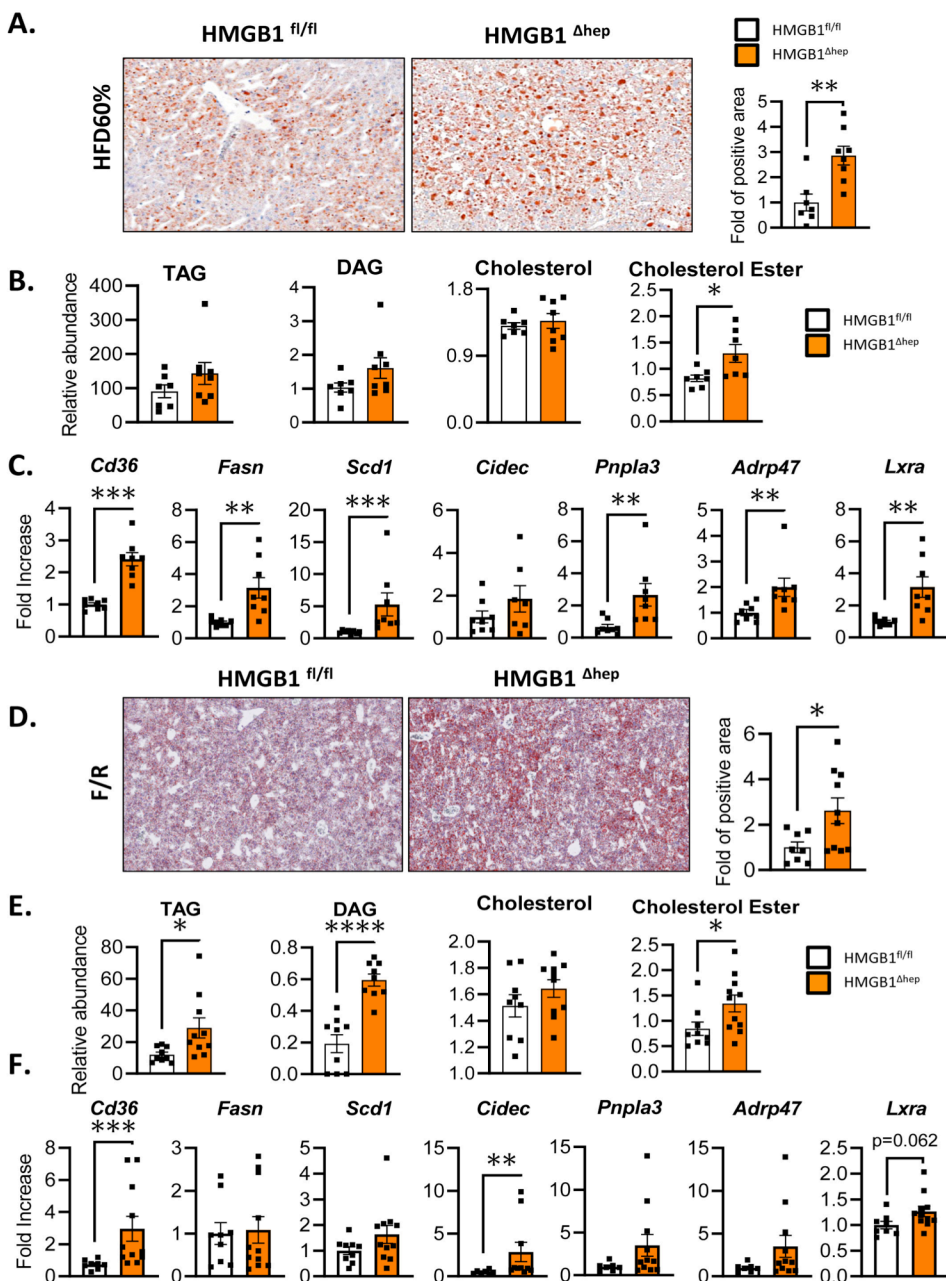

1114 **Fig. 1. Hepatocyte specific *Hmgb1* deleted mice on HFD or after fasting/refeeding**  
1115 **challenge exhibit a severe liver steatosis.**

1116 (A) Oil Red-O staining on liver section with quantification, (B) neutral lipid analysis and (C)  
1117 mRNA expression of hepatic steatosis markers from liver biopsies of HMGB1<sup>fl/fl</sup> and  
1118 HMGB1<sup>ΔHep</sup> mice subjected to 12-week HFD. (D) Oil Red-O staining on liver section with  
1119 quantification, (E) neutral lipid analysis and (F) mRNA expression of hepatic steatosis markers  
1120 from liver biopsies of HMGB1<sup>fl/fl</sup> and HMGB1<sup>ΔHep</sup> mice after a fasting/refeeding challenge.  
1121 Data are means ± SEM from n=7 (HMGB1<sup>fl/fl</sup>) or n=8 (HMGB1<sup>ΔHep</sup>) per group for the HFD  
1122 protocol (A-C) and from n=8 (HMGB1<sup>fl/fl</sup>) or n=8 (HMGB1<sup>ΔHep</sup>) per group for the F/R protocol  
1123 (D-F). \*p<0.05, \*\*p<0.01, \*\*\*p<0.001, \*\*\*\*p<0.0001 by unpaired Mann and Whitney  
1124 comparison.

1125  
1126

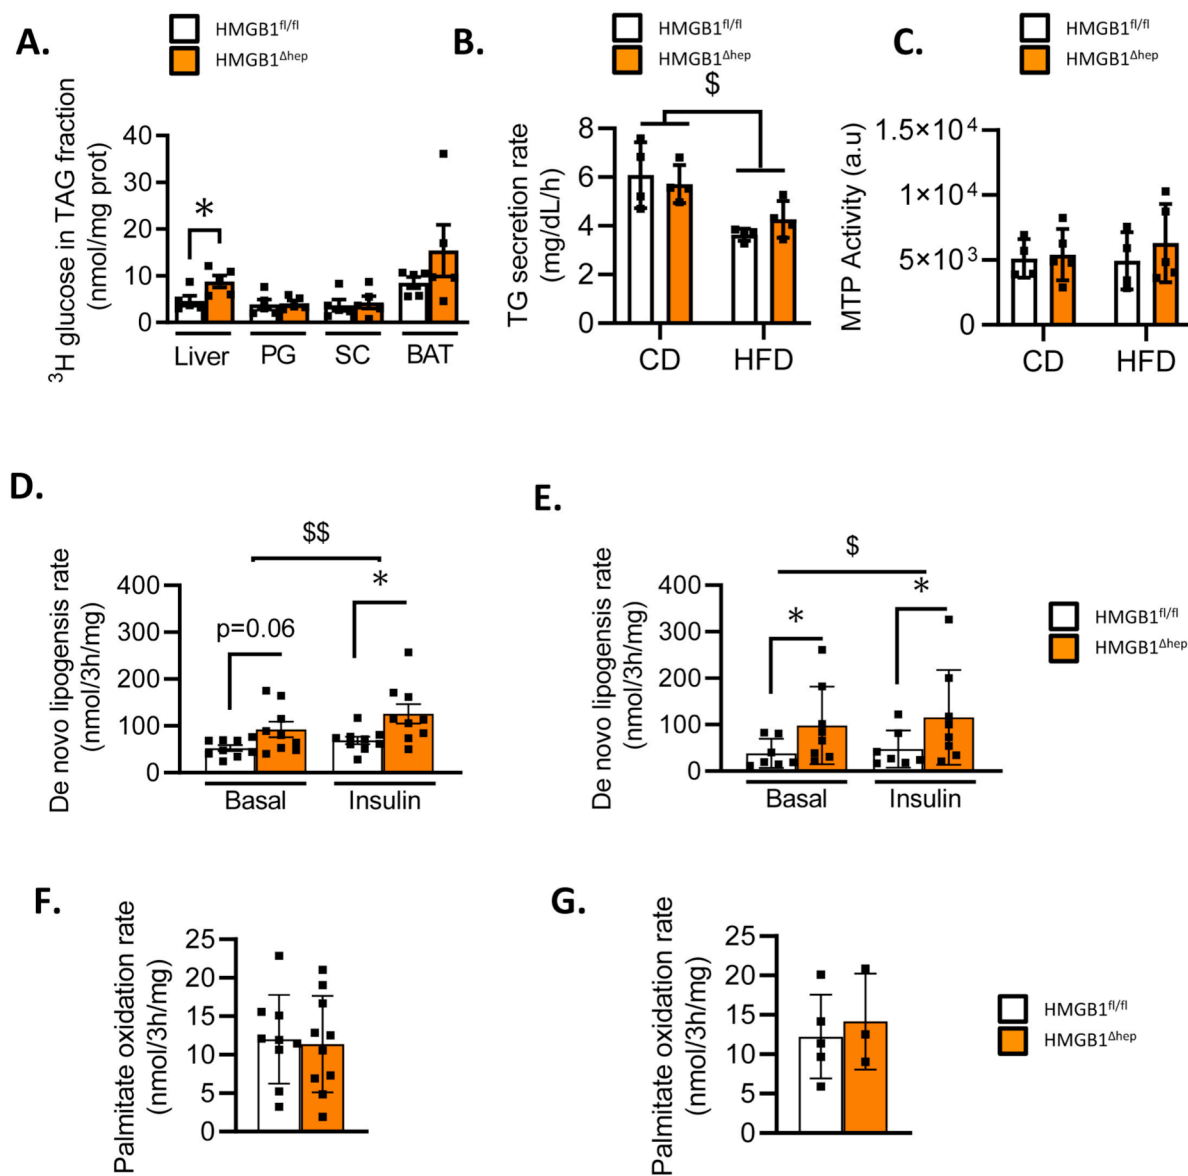

1127 **Fig. 2. *Hmgb1* deletion increases hepatocyte lipid synthesis *in vitro* and *in vivo*.**  
 1128 (A) *In vivo*, lipogenesis was measured on HMGB1<sup>fl/fl</sup> (n=5) and HMGB1<sup>ΔHep</sup> (n=5) mice.  
 1129 Mice were food deprived for six hours then injected with <sup>3</sup>H glucose (0.4 μCi/g, i.p) and euthanized  
 1130 one hour later and <sup>3</sup>H was measured in TAG fraction of liver, adipose tissues (PG, SC and  
 1131 BAT). (B-C) *In vivo*, assessment of liver lipoprotein secretions determined by (B) measuring  
 1132 circulating tri-acyl glycerol concentration (n=4 per genotype and diet) and (C) liver MTP  
 1133 activity, HMGB1<sup>fl/fl</sup> (n=4) and HMGB1<sup>ΔHep</sup> (n=5). (D-E) Lipid synthesis was measured *in vitro*,  
 1134 on primary hepatocytes isolated from adult HMGB1<sup>fl/fl</sup> (n=7-9) and HMGB1<sup>ΔHep</sup> (n=8-9) mice  
 1135 on (D) chow diet and (E) HFD. (F-G) Beta-oxidation was measured *in vitro*, on primary  
 1136 hepatocytes isolated from adult HMGB1<sup>fl/fl</sup> and HMGB1<sup>ΔHep</sup> mice on (F) chow diet (HMGB1<sup>fl/fl</sup>  
 1137 n=9 and HMGB1<sup>ΔHep</sup> n=10) and (G) HFD (HMGB1<sup>fl/fl</sup> n=5 and HMGB1<sup>ΔHep</sup> n=3). Data are  
 1138 means ± SEM of three independent experiments. p<0.05, \*\*p<0.01, \*\*\*p<0.001, \*\*\*\*p<0.0001  
 1139 by unpaired Mann and Whitney comparison or two-way ANOVA. \$ p<0.05, \$\$ p<0.01, \$\$\$  
 1140 p<0.001, for treatment effect by one-way ANOVA.



1141

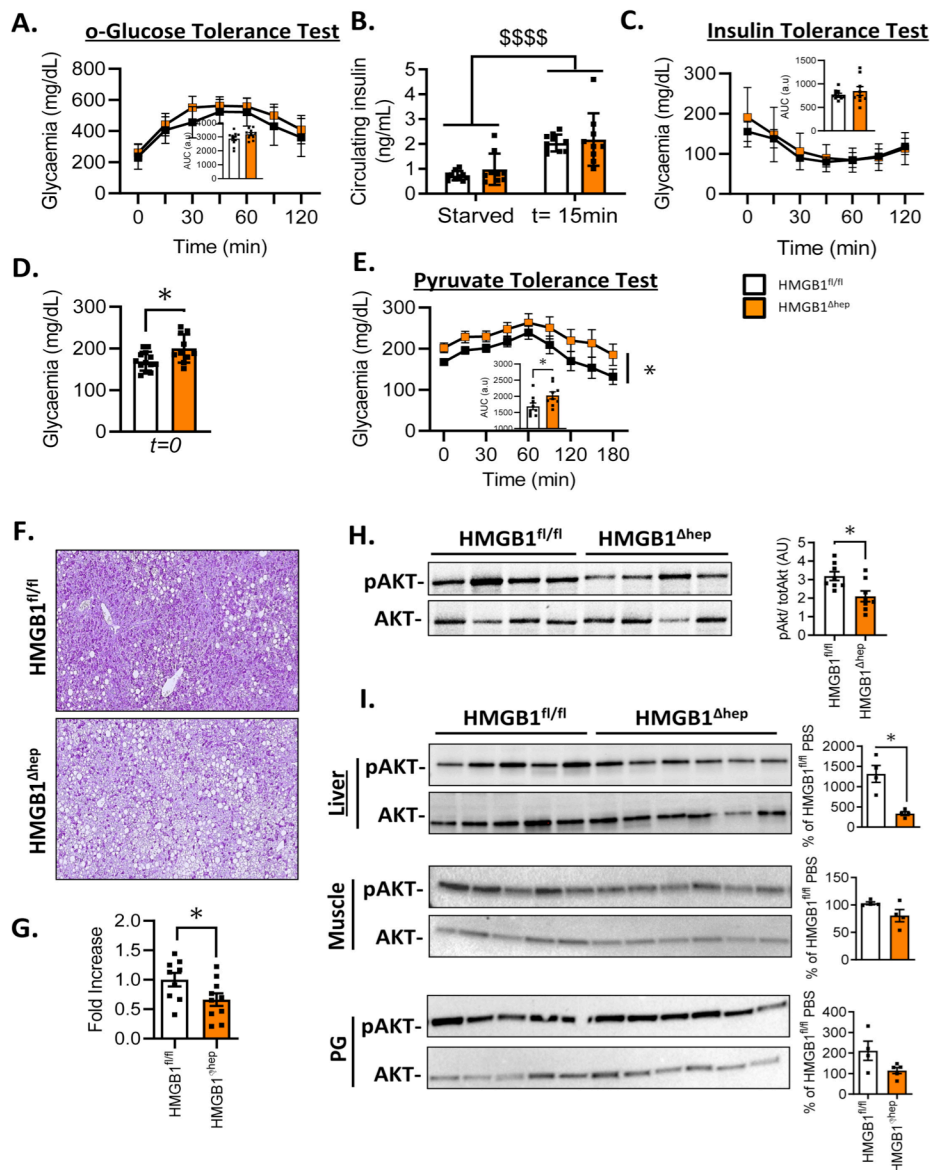

1142 **Fig. 3. Hepatocyte specific *Hmgbl* deleted mice on HFD display reduced insulin sensitivity**  
 1143 **in the liver.**

1144 (A) Analysis of oral glucose tolerance test, (B) Insulin levels after fasting or 15 minutes post  
 1145 glucose bolus, (C) insulin tolerance test (D) Fasting glycaemia levels after 16 hours of fasting.  
 1146 and (E) pyruvate tolerance test on HMGB1<sup>fl/fl</sup> and HMGB1<sup>ΔHep</sup> mice fed on HFD for 12 weeks.  
 1147 (F) Hepatic PAS staining representative images with (G) quantification on HMGB1<sup>fl/fl</sup> and  
 1148 HMGB1<sup>ΔHep</sup> mice fed on HFD for 12 weeks. (H) Representative immunoblot targeting p-AKT  
 1149 and tot-AKT with quantification performed on the whole animal cohort, on liver biopsies from  
 1150 on HMGB1<sup>fl/fl</sup> and HMGB1<sup>ΔHep</sup> mice fed on HFD for 12 weeks. (I) Representative immunoblot  
 1151 targeting p-AKT and tot-AKT with quantification performed on the whole animal cohort, on  
 1152 liver biopsies from HMGB1<sup>fl/fl</sup> and HMGB1<sup>ΔHep</sup> mice fed on HFD for 24 weeks, starved 4 hours  
 1153 and injected with insulin (i.p. 0.75U/kg-15 minutes). Data are means ± SEM from n=10  
 1154 (HMGB1<sup>fl/fl</sup>) or n=11 (HMGB1<sup>ΔHep</sup>) per group for the HFD protocol (A-H) and from n=4  
 1155 (HMGB1<sup>fl/fl</sup>) or n=4 (HMGB1<sup>ΔHep</sup>) per group for the HFD 24-week with acute injection of  
 1156 insulin protocol (I). \*p<0.05, \*\*p<0.01, \*\*\*p<0.001, \*\*\*\*p<0.0001 by unpaired Mann and  
 1157 Whitney comparison or two-way ANOVA.

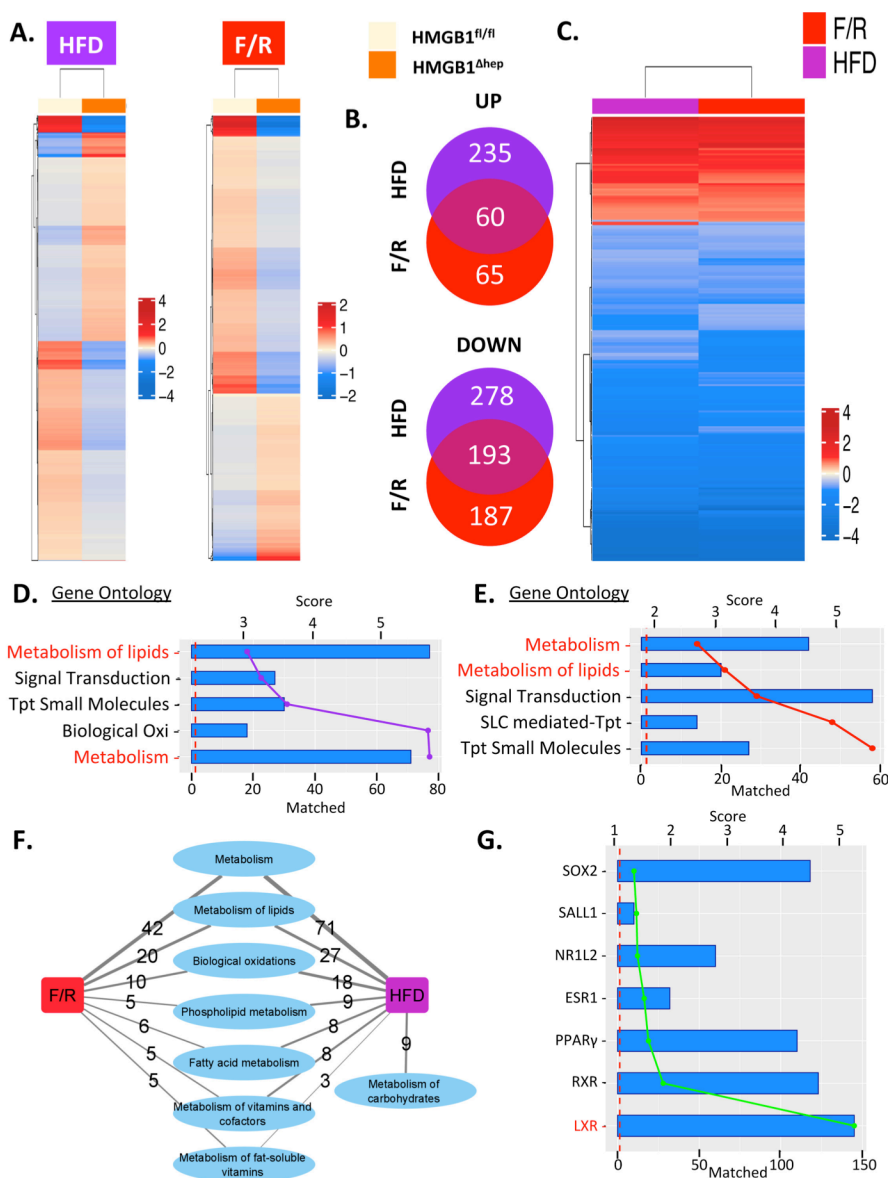

1158

1159

1160 **Fig. 4. Microarray analysis of hepatic gene expression profiles in HMGB1<sup>ΔHep</sup> mice.**

1161 (A) Heatmap showing genes that are differentially expressed in the livers of HMGB1<sup>ΔHep</sup> mice

1162 compared to HMGB1<sup>fl/fl</sup> mice (fold change > 1.5; P-Value <= 0.01) after HFD (left panel) or

1163 F/R (right panel). Heatmaps display the mean normalized expression per genotype per

1164 nutritional challenge. (B) Venn Diagram displaying overlap between up and down regulated

1165 genes in the two regimens. (C) Heatmap displaying only DEG commonly found in both

1166 regimens (fold change > 1.5; P-Value <= 0.01). (D-E) Top 5 GO biological processes enriched

1167 using gene sets for each regimen, with the -log<sub>10</sub>(P-Value) of enrichment shown as bars and the

1168 number of matched genes as colored lines. (F) Network displaying Reactome pathways related

1169 to metabolism that are enriched by our HMGB1 gene sets from both nutritional challenges, edge

1170 thickness represents the number of genes regulated by HMGB1 among each sub-category. (G)

1171 Top upstream regulators identified using the ChEA database, with the -log<sub>10</sub>(P-Value) of

1172 enrichment as bars and the number of gene matched per as a green line. Data are means ± SEM

1173 from n=4 (HMGB1<sup>fl/fl</sup>) or n=4 (HMGB1<sup>ΔHep</sup>) per group for the 12 week-HFD protocol and from

n=4 (HMGB1<sup>fl/fl</sup>) or n=4 (HMGB1<sup>ΔHep</sup>) per group for the F/R protocol.

1174  
1175  
1176  
1177  
1178  
1179  
1180  
1181  
1182  
1183  
1184  
1185  
1186  
1187  
1188  
1189  
1190  
1191  
1192  
1193  
1194  
1195  
1196  
1197  
1198  
1199  
1200  
1201  
1202  
1203  
1204  
1205  
1206  
1207  
1208  
1209  
1210  
1211  
1212  
1213  
1214  
1215  
1216  
1217  
1218  
1219  
1220  
1221  
1222  
1223

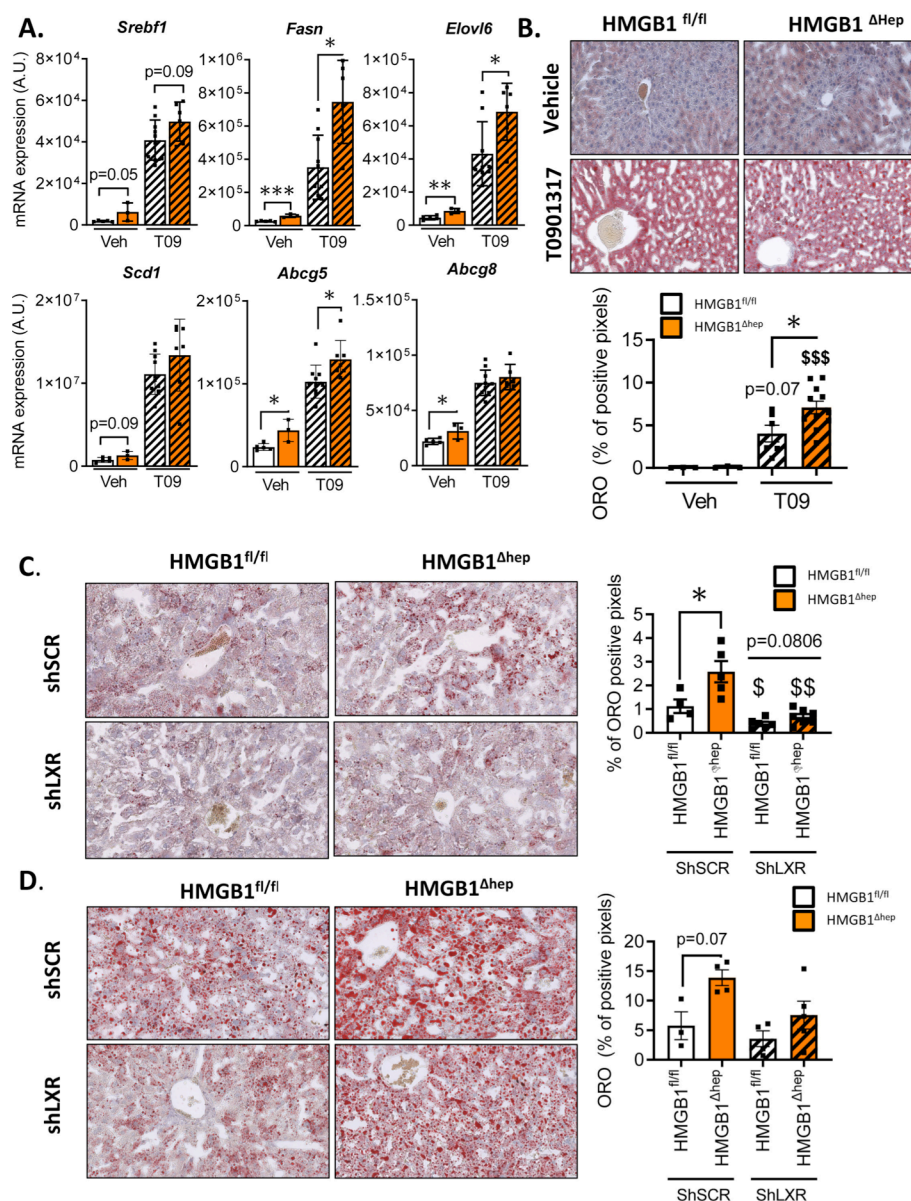

**Fig. 5. In vivo knockdown of LXR normalizes liver steatosis in HMGB1<sup>ΔHep</sup> mice.**

(A-B) HMGB1<sup>fl/fl</sup> (n=15) and HMGB1<sup>ΔHep</sup> (n=9) mice were treated either with vehicle (5% carboxy-methyl-cellulose) or LXR synthetic agonist T0901317 (oral gavage, 30 mg/kg/day) for four consecutive days, after 6 hours starvation on the last day mice were sacrificed. (A) Liver tissue was then subjected to RT-qPCR analysis of the indicated LXR dependent genes and (B) liver steatosis was quantified using Oil Red-O staining. (C) HMGB1<sup>fl/fl</sup> (n=10) and HMGB1<sup>ΔHep</sup> (n=12) mice were infected with either adenovirus expressing a LXR shRNA or a scramble (SCR) sequence, then subjected 7 days later to a F/R challenge. Liver steatosis was determined by Oil Red-O staining on liver sections with the quantitative representation displayed on the right. (D) HMGB1<sup>fl/fl</sup> and HMGB1<sup>ΔHep</sup> mice were subjected to HFD for four weeks and then infected with either adenovirus expressing a LXRα shRNA (n=7) or a scramble shRNA (SCR) n=9) sequence and euthanized 7 days later. Liver steatosis was assessed by Oil Red-O staining on liver section tissue with the quantitative representation displayed on the right. Data are means ± SEM. \*p<0.05, \*\*p<0.01, \*\*\*p<0.001, \*\*\*\*p<0.0001 HMGB1<sup>fl/fl</sup> and HMGB1<sup>ΔHep</sup> comparison, by unpaired Mann and Whitney comparison. \$ p<0.05, \$\$ p<0.01, \$\$\$ p<0.001, for treatment effect by one-way ANOVA.

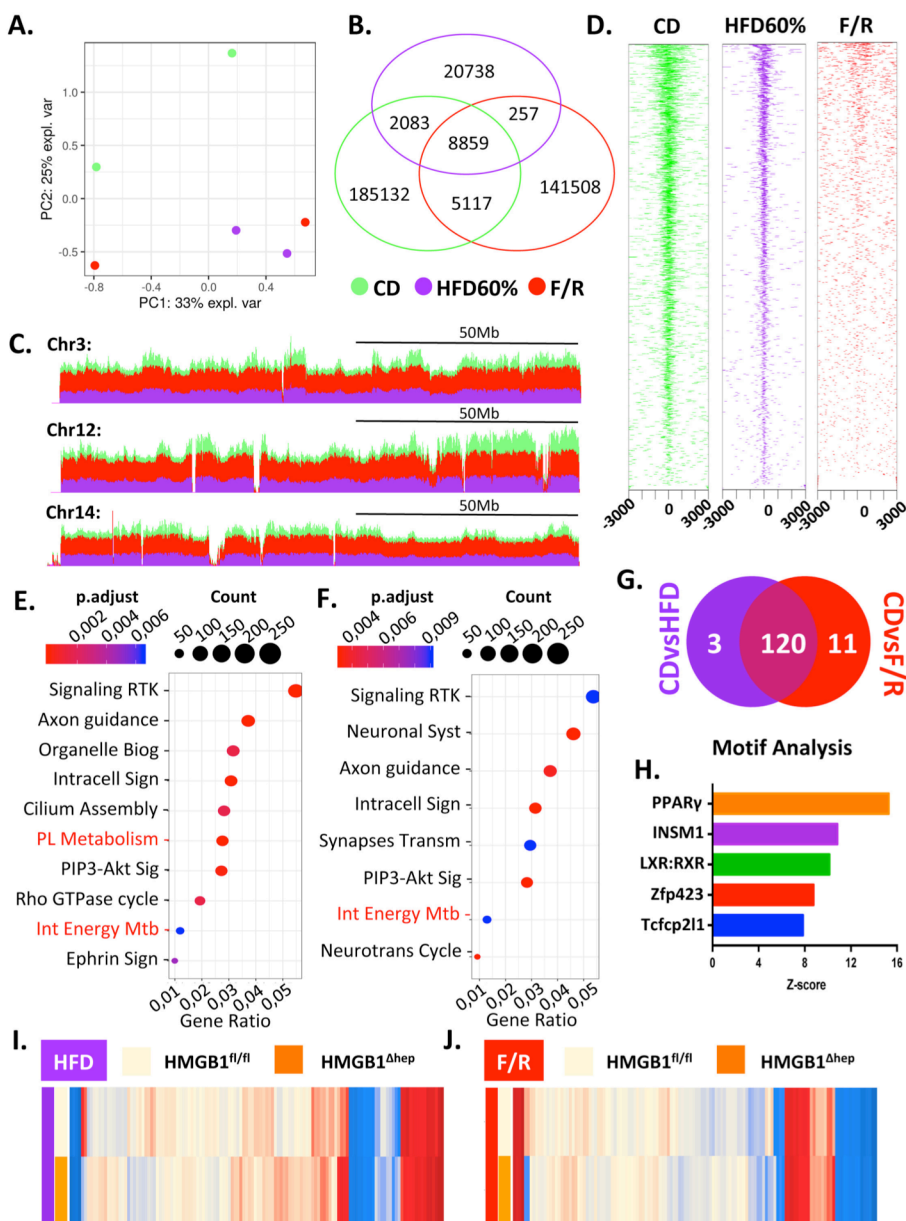

1224 **Fig. 6. ChIP-seq identified a subset of LXR responsive genes to be negatively regulated by**  
 1225 **HMGB1 during liver steatosis.**

1226 (A) Principal component analysis scores plot of ChIP-seq data of liver tissue from HMGB1<sup>fl/fl</sup>  
 1227 mice on chow diet (green) or subjected to F/R (red) or HFD (purple). (B) Venn Diagram  
 1228 showing the number of HMGB1 binding peaks, (C) UCSC genome browser of tracks (stacked)  
 1229 showing HMGB1 differential chromatin occupancy and (D) average signal density profiles  
 1230 around transcription starting site in different nutritional states: chow diet (green) or during HFD  
 1231 (purple) or after F/R (red). (E-F) Functional enrichment analyses showing GO terms associated  
 1232 with the differential HMGB1 chromatin binding sites between (E) chow diet and HFD and (F)  
 1233 chow diet and F/R. (G) Venn Diagram displaying shared enriched genes (n=134) displaying a  
 1234 very high occupancy rate during fed state belonging to “Integration of energy metabolism” and  
 1235 “Phospholipid metabolism” GO functions compared to HFD (purple) and F/R (red). (H) Graph  
 1236 bar displaying consensus motifs in promoters of the 134 genes differentially occupied by  
 1237 HMGB1 via OPOSUM analysis; the bars represent the z-score. (I-J) Heatmaps displaying the  
 1238 mean microarray expression levels for the 134 genes identified by ChIP-seq in liver from  
 1239 HMGB1<sup>fl/fl</sup> (n=4) and HMGB1<sup>ΔHep</sup> (n=4) mice subjected to either HFD (I) or F/R (J).



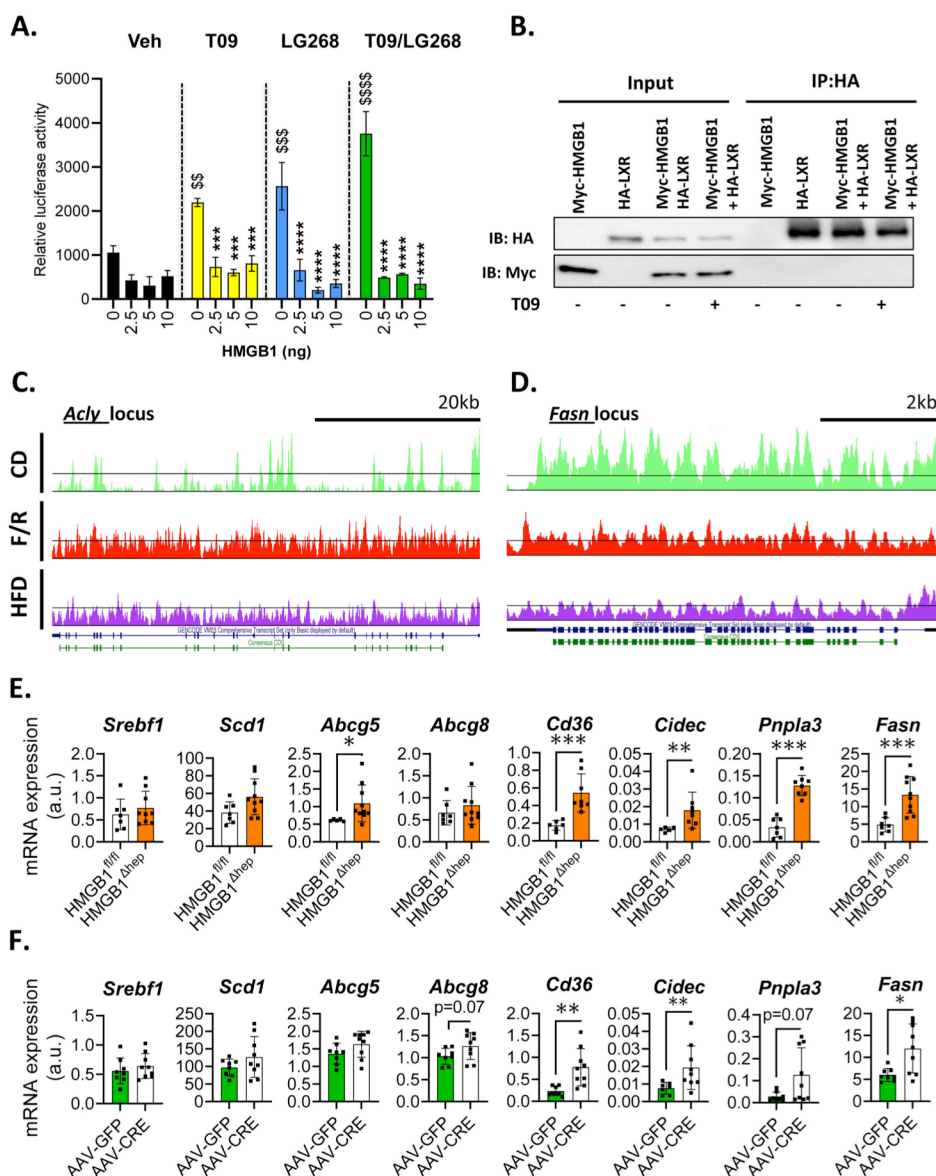

**Fig. 7. HMGB1 represses LXR $\alpha$  transcriptional activity *in vitro*.**

(A) Effect of HMGB1 on LXRE-luciferase reporter activity. Ad293 cells were treated with DMSO (vehicle), T0901317 (noted T09) (0.1  $\mu$ M) and/or LG286 (1 nM) for 14 hours. (B) Co-immunoprecipitation assay was performed to detect a potential interaction between HMGB1 and LXR in Ad293 transfected cells treated with DMSO (vehicle) or T0901317 (0.1 nM) for 14 hours. Data are representative of three independent experiments. (C-D) Genome browser shot of ChIP-seq data along the locus of *Acly* and *Fasn* gene loci in liver from HMGB1<sup>fl/fl</sup> and HMGB1<sup>ΔHep</sup> mice upon chow diet (green), HFD (purple) and after F/R (red). Gene (blue) and CDS (green) models are displayed on the bottom track. (E) Gene expression of direct (*Srebf1*, *Scd-1*, *Abcg-5* and *Abcg-8*) and indirect (*Cd-36*, *Cidec*, *Pnpla3* and *Fasn*) targets of LXR $\alpha$  in livers of HMGB1<sup>fl/fl</sup> (n=7) and HMGB1<sup>ΔHep</sup> (n=9) mice. (F) Adult HMGB1<sup>fl/fl</sup> mice were infected either with AAV8-Gfp (n=8) or AAV8-TBG-Cre (n=9) to selectively generate *Hmgb1* deletion in hepatocytes *in vivo* and expression of direct (*Srebf1*, *Scd-1*, *Abcg-5* and *Abcg-8*) and indirect (*Cd-36*, *Cidec*, *Pnpla3* and *Fasn*) responsive genes were determined using RT-qPCR. Data are means  $\pm$  SEM of three independent experiments. \*p<0.05, \*\*p<0.01, \*\*\*p<0.001, \*\*\*\*p<0.0001 by unpaired Mann and Whitney comparison or two-way ANOVA. \$ p<0.05, \$\$ p<0.01, \$\$\$ p<0.001, for treatment effect by two-way ANOVA.
